# Supplementary material for: Computed Tomography-Based Radiomics Using Tumor and Vessel Features to Assess Resectability in Cancer of the Pancreatic Head
Source: MDPI journal article supplement (doi:10.3390/diagnostics13203198), 2023-10-13
Supplement: s1 [file s1]

## Supplementary files

Complete list of extracted tumour features (N=107; PyRadiomics package version 3.0.1 [1]), including ICC value of interobserver analysis, according to McGraw & Wong [2]

**Table S1.** Extracted tumour features with ICC values of interobserver analysis

| Class                           | Feature                        | ICC value |
|---------------------------------|--------------------------------|-----------|
| Shape-based                     | Elongation                     | 0.53      |
|                                 | Flatness                       | 0.90      |
|                                 | Least Axis Length              | 0.92      |
|                                 | Major Axis Length              | 0.87      |
|                                 | Maximum 2D Diameter Column     | 0.84      |
|                                 | Maximum 2D Diameter Row        | 0.50      |
|                                 | Maximum 2D Diameter Slice      | 0.90      |
|                                 | Maximum 3D Diameter            | 0.87      |
|                                 | Mesh Volume                    | 0.93      |
|                                 | Minor Axis Length              | 0.81      |
|                                 | Sphericity                     | 0.72      |
|                                 | Surface Area                   | 0.91      |
|                                 | Surface Volume Ratio           | 0.78      |
|                                 | Voxel Volume                   | 0.93      |
| First Order Statistics          | 10th Percentile                | 0.98      |
|                                 | 90th Percentile                | 0.94      |
|                                 | Energy                         | 0.79      |
|                                 | Entropy                        | 0.94      |
|                                 | Interquartile Range            | 0.97      |
|                                 | Kurtosis                       | 0.74      |
|                                 | Maximum                        | 0.89      |
|                                 | Mean Absolute Deviation        | 0.95      |
|                                 | Mean                           | 0.97      |
|                                 | Median                         | 0.97      |
|                                 | Minimum                        | 0.94      |
|                                 | Range                          | 0.93      |
|                                 | Robust Mean Absolute Deviation | 0.97      |
|                                 | Root Mean Squared              | 0.97      |
|                                 | Skewness                       | 0.72      |
|                                 | Total Energy                   | 0.79      |
|                                 | Uniformity                     | 0.95      |
|                                 | Variance                       | 0.93      |
| Gray Level Co-occurrence Matrix | Autocorrelation                | 0.94      |
|                                 | Cluster Prominence             | 0.79      |
|                                 | Cluster Shade                  | 0.74      |
|                                 | Cluster Tendency               | 0.93      |

|                                     |                                           |      |
|-------------------------------------|-------------------------------------------|------|
|                                     | Contrast                                  | 0.99 |
|                                     | Correlation                               | 0.95 |
|                                     | Difference Average                        | 1.00 |
|                                     | Difference Entropy                        | 0.99 |
|                                     | Difference Variance                       | 0.99 |
|                                     | Inverse Difference                        | 1.00 |
|                                     | Inverse Difference Moment                 | 1.00 |
|                                     | Inverse Difference Moment Normalized      | 0.88 |
|                                     | Inverse Difference Normalized             | 0.93 |
|                                     | Informational Measure of Correlation 1    | 0.97 |
|                                     | Informational Measure of Correlation 2    | 0.95 |
|                                     | Inverse Variance                          | 1.00 |
|                                     | Joint Average                             | 0.90 |
|                                     | Joint Energy                              | 0.97 |
|                                     | Joint Entropy                             | 0.97 |
|                                     | Maximal Correlation Coefficient           | 0.91 |
|                                     | Maximum Probability                       | 0.98 |
|                                     | Sum Average                               | 0.90 |
|                                     | Sum Entropy                               | 0.94 |
|                                     | Sum Squares                               | 0.95 |
| <b>Gray Level Dependence matrix</b> | Dependence Entropy                        | 0.91 |
|                                     | Dependence Non Uniformity                 | 0.92 |
|                                     | Dependence Non Uniformity Normalized      | 1.00 |
|                                     | Dependence Variance                       | 1.00 |
|                                     | Gray Level Non Uniformity                 | 0.94 |
|                                     | Gray Level Variance                       | 0.93 |
|                                     | High Gray Level Emphasis                  | 0.94 |
|                                     | Large Dependence Emphasis                 | 1.00 |
|                                     | Large Dependence High Gray Level Emphasis | 0.91 |
|                                     | Large Dependence Low Gray Level Emphasis  | 0.47 |
|                                     | Low Gray Level Emphasis                   | 0.31 |
|                                     | Small Dependence Emphasis                 | 0.99 |
|                                     | Small Dependence High Gray Level Emphasis | 0.95 |
|                                     | Small Dependence Low Gray Level Emphasis  | 0.46 |
| <b>Gray Level Run Length Matrix</b> | Gray Level Non Uniformity                 | 0.94 |
|                                     | Gray Level Non Uniformity Normalized      | 0.94 |
|                                     | Gray Level Variance                       | 0.91 |
|                                     | High Gray Level Run Emphasis              | 0.94 |
|                                     | Long Run Emphasis                         | 1.00 |
|                                     | Long Run High Gray Level Emphasis         | 0.90 |
|                                     | Long Run Low Gray Level Emphasis          | 0.45 |
|                                     | Low Gray Level Run Emphasis               | 0.30 |
|                                     | Run Entropy                               | 0.92 |
|                                     | Run Length Non Uniformity                 | 0.93 |
|                                     | Run Length Non Uniformity Normalized      | 1.00 |

|                                                 |                                      |      |
|-------------------------------------------------|--------------------------------------|------|
|                                                 | Run Percentage                       | 1.00 |
|                                                 | Run Variance                         | 1.00 |
|                                                 | Short Run Emphasis                   | 1.00 |
|                                                 | Short Run High Gray Level Emphasis   | 0.94 |
|                                                 | Short Run Low Gray Level Emphasis    | 0.29 |
| <b>Gray Level Size Zone Matrix</b>              | Gray Level Non Uniformity            | 0.95 |
|                                                 | Gray Level Non Uniformity Normalized | 0.71 |
|                                                 | Gray Level Variance                  | 0.85 |
|                                                 | High Gray Level Zone Emphasis        | 0.95 |
|                                                 | Large Area Emphasis                  | 0.95 |
|                                                 | Large Area High Gray Level Emphasis  | 0.97 |
|                                                 | Large Area Low Gray Level Emphasis   | 0.52 |
|                                                 | Low Gray Level Zone Emphasis         | 0.19 |
|                                                 | Size Zone Non Uniformity             | 0.92 |
|                                                 | Size Zone Non Uniformity Normalized  | 0.92 |
|                                                 | Small Area Emphasis                  | 0.88 |
|                                                 | Small Area High Gray Level Emphasis  | 0.94 |
|                                                 | Small Area Low Gray Level Emphasis   | 0.23 |
|                                                 | Zone Entropy                         | 0.84 |
|                                                 | Zone Percentage                      | 0.96 |
|                                                 | Zone Variance                        | 0.95 |
| <b>Neighbouring Gray Tone Difference Matrix</b> | Busyness                             | 0.40 |
|                                                 | Coarseness                           | 0.73 |
|                                                 | Complexity                           | 0.91 |
|                                                 | Contrast                             | 0.91 |
|                                                 | Strength                             | 0.54 |

## Collinearity assessment of tumour features

Results of collinearity assessment using Spearman correlation coefficient are shown in a separate excel matrix file. The remaining tumour features after removal of collinear features are shown in Table S2.

**Table S2.** Remaining tumour features

| Class                                    | Feature                                   |
|------------------------------------------|-------------------------------------------|
| Shape-based                              | Flatness                                  |
|                                          | Least Axis Length                         |
|                                          | Major Axis Length                         |
|                                          | Maximum 2D Diameter Slice                 |
|                                          | Surface Volume Ratio                      |
| First Order Statistics                   | 10th Percentile                           |
|                                          | 90th Percentile                           |
|                                          | Energy                                    |
|                                          | Entropy                                   |
|                                          | Maximum                                   |
|                                          | Minimum                                   |
|                                          | Range                                     |
|                                          | Uniformity                                |
| Gray Level Co-occurrence Matrix          | Autocorrelation                           |
|                                          | Contrast                                  |
|                                          | Correlation                               |
|                                          | Inverse Difference                        |
|                                          | Inverse Difference Moment Normalized      |
|                                          | Informational Measure of Correlation 1    |
|                                          | Inverse Variance                          |
| Gray Level Dependence matrix             | Dependence Entropy                        |
|                                          | Large Dependence High Gray Level Emphasis |
|                                          | Small Dependence Emphasis                 |
|                                          | Small Dependence High Gray Level Emphasis |
| Gray Level Size Zone Matrix              | Large Area Emphasis                       |
|                                          | Large Area High Gray Level Emphasis       |
|                                          | Size Zone Non Uniformity Normalized       |
|                                          | Zone Entropy                              |
| Neighbouring Gray Tone Difference Matrix | Contrast                                  |

### Collinearity assessment of vessel features

From the six vessel features, three showed high collinearity: the arterial vessel-tumour contact-length and contact-area were collinear with the arterial angle of encasement; and the venous tumour-vessel contact-area was collinear with the venous tumour-vessel contact-length. The three remaining vessel features after the collinearity analysis were; venous angle of encasement, venous tumour-vessel contact-length, and the arterial angle of encasement. These features also align with clinical practice. The results of the collinearity assessment of the vessel features is shown in Table S3.

**Table S3.** Collinearity assessment of vessel features

| Veins        |       |        |              | Arteries     |       |        |              |
|--------------|-------|--------|--------------|--------------|-------|--------|--------------|
|              | Angle | Length | Contact-area |              | Angle | Length | Contact-area |
| Angle        | 1     | 0.85   | 0.88         | Angle        | 1     | 0.96   | 0.97         |
| Length       | -     | 1      | 0.95         | Length       | -     | 1      | 0.98         |
| Contact-area | -     | -      | 1            | Contact-area | -     | -      | 1            |

### References

- 1 van Griethuysen JJM, Fedorov A, Parmar C et al (2017) Computational Radiomics System to Decode the Radiographic Phenotype. *Cancer Res* 77:e104-e107. Doi:10.1158/0008-5472.Can-17-0339
- 2 McGraw K, Wong SP (1996) Forming Inferences About Some Intraclass Correlation Coefficients. *Psychological Methods* 1:30-46. Doi:10.1037/1082-989X.1.1.30
