# Supplementary material for: Computed Tomography-Based Radiomics Using Tumor and Vessel Features to Assess Resectability in Cancer of the Pancreatic Head
Source: Diagnostics (Basel). 2023 Oct 13;13(20):3198. doi: 10.3390/diagnostics13203198 (PMC10606005; doi:10.3390/diagnostics13203198)
Supplement: Supplementary file 1 [file diagnostics-13-03198-s001.zip › Supplementary file_Excel Matrix file_Collinearity assessment.xlsx]

## Sheet: Full Dataset
	original_shape_Flatness	original_shape_LeastAxisLength	original_shape_MajorAxisLength	original_shape_Maximum2DDiameterColumn	original_shape_Maximum2DDiameterSlice	original_shape_Maximum3DDiameter	original_shape_MeshVolume	original_shape_MinorAxisLength	original_shape_SurfaceArea	original_shape_SurfaceVolumeRatio	original_shape_VoxelVolume	original_firstorder_10Percentile	original_firstorder_90Percentile	original_firstorder_Energy	original_firstorder_Entropy	original_firstorder_InterquartileRange	original_firstorder_Maximum	original_firstorder_MeanAbsoluteDeviation	original_firstorder_Mean	original_firstorder_Median	original_firstorder_Minimum	original_firstorder_Range	original_firstorder_RobustMeanAbsoluteDeviation	original_firstorder_RootMeanSquared	original_firstorder_TotalEnergy	original_firstorder_Uniformity	original_firstorder_Variance	original_glcm_Autocorrelation	original_glcm_ClusterProminence	original_glcm_ClusterTendency	original_glcm_Contrast	original_glcm_Correlation	original_glcm_DifferenceAverage	original_glcm_DifferenceEntropy	original_glcm_DifferenceVariance	original_glcm_Id	original_glcm_Idm	original_glcm_Idmn	original_glcm_Idn	original_glcm_Imc1	original_glcm_Imc2	original_glcm_InverseVariance	original_glcm_JointAverage	original_glcm_JointEnergy	original_glcm_JointEntropy	original_glcm_MCC	original_glcm_MaximumProbability	original_glcm_SumAverage	original_glcm_SumEntropy
original_shape_Flatness	1	0.483128	0.0421789	0.0777109	0.202837	0.0381022	0.324399	0.258638	0.248353	0.479095	0.324399	0.103712	0.0438343	0.216389	0.078775	0.041721	0.112113	0.0715368	0.0933042	0.101581	0.267021	0.247596	0.0528336	0.177081	0.216389	0.0663414	0.0848332	0.273344	0.15873	0.110739	0.0424959	0.152601	0.0358036	0.0373182	0.0277201	0.0351168	0.0341834	0.214522	0.177451	0.123208	0.139375	0.0205875	0.273925	0.0109366	0.0381283	0.166496	0.0226832	0.273925	0.0996266
original_shape_LeastAxisLength	0.483128	1	0.782924	0.847819	0.851575	0.804725	0.970677	0.911521	0.940985	0.844123	0.970677	0.454563	0.112078	0.847593	0.43195	0.373499	0.388292	0.408369	0.357332	0.362298	0.624899	0.608996	0.388838	0.339245	0.847593	0.413635	0.412965	0.595858	0.493061	0.457205	0.182135	0.257723	0.175126	0.191469	0.201173	0.166391	0.169349	0.413687	0.322232	0.182575	0.243669	0.125938	0.596492	0.32461	0.366172	0.289898	0.277341	0.596492	0.468811
original_shape_MajorAxisLength	0.0421789	0.782924	1	0.966063	0.857713	0.979738	0.878095	0.881846	0.915589	0.619122	0.878095	0.508929	0.131327	0.863513	0.420433	0.380825	0.322532	0.409654	0.395742	0.384048	0.673664	0.571202	0.390282	0.221091	0.863513	0.405674	0.423074	0.557501	0.484168	0.463193	0.221391	0.20702	0.208957	0.226604	0.235832	0.198936	0.201965	0.409919	0.330703	0.118471	0.180938	0.100859	0.557008	0.334173	0.366243	0.234352	0.309359	0.557008	0.448593
original_shape_Maximum2DDiameterColumn	0.0777109	0.847819	0.966063	1	0.865737	0.971223	0.919049	0.909195	0.946144	0.659164	0.919049	0.521151	0.154691	0.890509	0.401789	0.359108	0.339295	0.387128	0.412118	0.404713	0.658151	0.562081	0.370863	0.254619	0.890509	0.388017	0.393952	0.542497	0.466098	0.442252	0.189614	0.227823	0.178651	0.194466	0.204364	0.169388	0.171994	0.419198	0.334769	0.149733	0.209066	0.0913246	0.542638	0.305375	0.340035	0.259039	0.281159	0.542638	0.438985
original_shape_Maximum2DDiameterSlice	0.202837	0.851575	0.857713	0.865737	1	0.895507	0.897137	0.954191	0.922666	0.695568	0.897137	0.475902	0.0696378	0.791351	0.486655	0.4254	0.394227	0.474872	0.350311	0.332479	0.678396	0.677322	0.438618	0.291065	0.791351	0.463847	0.511443	0.670436	0.595426	0.548878	0.251755	0.259768	0.244243	0.259152	0.265536	0.238801	0.240228	0.49192	0.395125	0.148187	0.225645	0.111405	0.671422	0.393839	0.432559	0.303763	0.346736	0.671422	0.507886
original_shape_Maximum3DDiameter	0.0381022	0.804725	0.979738	0.971223	0.895507	1	0.884575	0.909222	0.930937	0.603348	0.884575	0.513909	0.121545	0.868602	0.433962	0.387485	0.334431	0.427093	0.394724	0.379094	0.698317	0.597686	0.399479	0.22104	0.868602	0.416615	0.450393	0.592517	0.518426	0.490917	0.231607	0.216444	0.220635	0.237736	0.246225	0.211706	0.214313	0.435494	0.350651	0.11406	0.185421	0.0949605	0.592482	0.343941	0.378037	0.252485	0.314944	0.592482	0.45875
original_shape_MeshVolume	0.324399	0.970677	0.878095	0.919049	0.897137	0.884575	1	0.957892	0.978514	0.844511	1	0.477968	0.119686	0.895407	0.443362	0.389384	0.392765	0.420626	0.371526	0.370963	0.656511	0.626184	0.403526	0.317601	0.895407	0.42672	0.426068	0.615001	0.510162	0.474517	0.196295	0.263534	0.185129	0.203392	0.216301	0.175214	0.178278	0.450741	0.357191	0.184513	0.246997	0.121817	0.614491	0.337519	0.377391	0.298017	0.298299	0.614491	0.484379
original_shape_MinorAxisLength	0.258638	0.911521	0.881846	0.909195	0.954191	0.909222	0.957892	1	0.967261	0.760329	0.957892	0.494294	0.116463	0.842027	0.460674	0.403878	0.374784	0.44544	0.382868	0.370205	0.676764	0.65327	0.417351	0.324434	0.842027	0.442253	0.465147	0.651351	0.555916	0.513296	0.214962	0.269557	0.206315	0.22162	0.229738	0.198179	0.200398	0.48304	0.391656	0.170794	0.241362	0.111937	0.65121	0.358089	0.396745	0.311542	0.317442	0.65121	0.496178
original_shape_SurfaceArea	0.248353	0.940985	0.915589	0.946144	0.922666	0.930937	0.978514	0.967261	1	0.732503	0.978514	0.524779	0.124247	0.883026	0.47471	0.412877	0.39273	0.452203	0.403596	0.393399	0.689373	0.646015	0.427776	0.317301	0.883026	0.452908	0.463492	0.633546	0.539977	0.5031	0.226181	0.244056	0.216688	0.235251	0.244479	0.207619	0.210049	0.439012	0.342344	0.151404	0.224543	0.121095	0.633211	0.364957	0.407171	0.276901	0.318305	0.633211	0.504614
original_shape_SurfaceVolumeRatio	0.479095	0.844123	0.619122	0.659164	0.695568	0.603348	0.844511	0.760329	0.732503	1	0.844511	0.273203	0.0939558	0.738403	0.273097	0.251594	0.292452	0.256683	0.228065	0.244003	0.504015	0.48739	0.258057	0.264221	0.738403	0.269786	0.258656	0.507696	0.355447	0.31753	0.0712021	0.276848	0.059385	0.0722412	0.0901166	0.0510373	0.0549294	0.45326	0.381547	0.231922	0.261914	0.0680145	0.506833	0.196312	0.223345	0.31311	0.185111	0.506833	0.329312
original_shape_VoxelVolume	0.324399	0.970677	0.878095	0.919049	0.897137	0.884575	1	0.957892	0.978514	0.844511	1	0.477968	0.119686	0.895407	0.443362	0.389384	0.392765	0.420626	0.371526	0.370963	0.656511	0.626184	0.403526	0.317601	0.895407	0.42672	0.426068	0.615001	0.510162	0.474517	0.196295	0.263534	0.185129	0.203392	0.216301	0.175214	0.178278	0.450741	0.357191	0.184513	0.246997	0.121817	0.614491	0.337519	0.377391	0.298017	0.298299	0.614491	0.484379
original_firstorder_10Percentile	0.103712	0.454563	0.508929	0.521151	0.475902	0.513909	0.477968	0.494294	0.524779	0.273203	0.477968	1	0.569247	0.284773	0.406608	0.385421	0.0638759	0.392712	0.900056	0.876792	0.615019	0.392554	0.387359	0.730425	0.284773	0.396499	0.381424	0.29932	0.338294	0.366701	0.329365	0.0193899	0.329083	0.33021	0.326776	0.331654	0.332112	0.0601775	0.0156211	0.0719946	0.0302208	0.00725582	0.301451	0.364675	0.38403	0.0250255	0.328203	0.301451	0.392061
original_firstorder_90Percentile	0.0438343	0.112078	0.131327	0.154691	0.0696378	0.121545	0.119686	0.116463	0.124247	0.0939558	0.119686	0.569247	1	0.149378	0.44618	0.454299	0.553063	0.458913	0.841217	0.844616	0.0931105	0.232415	0.456712	0.86309	0.149378	0.454968	0.465922	0.23835	0.440421	0.456078	0.331179	0.101934	0.31915	0.337713	0.349917	0.312353	0.313568	0.0947483	0.122521	0.0124335	0.111056	0.00919305	0.23002	0.449967	0.439752	0.0831249	0.458402	0.23002	0.441302
original_firstorder_Energy	0.216389	0.847593	0.863513	0.890509	0.791351	0.868602	0.895407	0.842027	0.883026	0.738403	0.895407	0.284773	0.149378	1	0.480311	0.434662	0.485647	0.46469	0.107305	0.103519	0.645204	0.611585	0.448258	0.0595787	1	0.46749	0.477722	0.624053	0.555405	0.51777	0.273132	0.239196	0.256155	0.278116	0.298862	0.243422	0.246592	0.387729	0.298809	0.141735	0.225142	0.068085	0.622962	0.390969	0.423761	0.273168	0.377003	0.622962	0.51784
original_firstorder_Entropy	0.078775	0.43195	0.420433	0.401789	0.486655	0.433962	0.443362	0.460674	0.47471	0.273097	0.443362	0.406608	0.44618	0.480311	1	0.980029	0.73363	0.995333	0.030168	0.00396252	0.541862	0.741696	0.986193	0.0883907	0.480311	0.994576	0.983217	0.629654	0.902504	0.960797	0.747966	0.167254	0.731781	0.761227	0.770543	0.723522	0.726568	0.0461942	0.0769258	0.00672748	0.17347	0.0267514	0.62194	0.947536	0.961343	0.135959	0.901483	0.62194	0.98017
original_firstorder_InterquartileRange	0.041721	0.373499	0.380825	0.359108	0.4254	0.387485	0.389384	0.403878	0.412877	0.251594	0.389384	0.385421	0.454299	0.434662	0.980029	1	0.72044	0.98621	0.013772	0.00873516	0.465605	0.680392	0.998133	0.100296	0.434662	0.993237	0.957275	0.552288	0.850252	0.944384	0.731482	0.169015	0.716336	0.743686	0.751065	0.70901	0.712832	0.00639287	0.119862	0.0185798	0.179282	0.0383044	0.542813	0.950442	0.949685	0.120813	0.917985	0.542813	0.972703
original_firstorder_Maximum	0.112113	0.388292	0.322532	0.339295	0.394227	0.334431	0.392765	0.374784	0.39273	0.292452	0.392765	0.0638759	0.553063	0.485647	0.73363	0.72044	1	0.72479	0.216953	0.215191	0.361118	0.775369	0.72169	0.267444	0.485647	0.730548	0.718643	0.542161	0.686344	0.687929	0.614579	0.0387447	0.595541	0.619298	0.640361	0.587404	0.588813	0.203955	0.0838998	0.0942552	0.0536966	0.0426191	0.535733	0.730918	0.7371	0.038868	0.709168	0.535733	0.721003
original_firstorder_MeanAbsoluteDeviation	0.0715368	0.408369	0.409654	0.387128	0.474872	0.427093	0.420626	0.44544	0.452203	0.256683	0.420626	0.392712	0.458913	0.46469	0.995333	0.98621	0.72479	1	0.0161495	0.0138072	0.527914	0.729421	0.99123	0.105086	0.46469	0.994629	0.988077	0.621112	0.907048	0.970466	0.734564	0.188193	0.717657	0.748019	0.758004	0.70945	0.712726	0.0543306	0.063189	0.0250255	0.190659	0.0157268	0.612518	0.944278	0.954334	0.157022	0.900638	0.612518	0.979131
original_firstorder_Mean	0.0933042	0.357332	0.395742	0.412118	0.350311	0.394724	0.371526	0.382868	0.403596	0.228065	0.371526	0.900056	0.841217	0.107305	0.030168	0.013772	0.216953	0.0161495	1	0.990472	0.43903	0.144676	0.0124159	0.899845	0.107305	0.0196893	0.00796027	0.0828255	0.0012504	0.00452608	0.0407347	0.0838998	0.0466697	0.0377056	0.0294812	0.0519179	0.0514424	0.0934803	0.060565	0.0715191	0.0988694	0.0391145	0.0889014	0.00653376	0.0213096	0.0672748	0.0230883	0.0889014	0.0224895
original_firstorder_Median	0.101581	0.362298	0.384048	0.404713	0.332479	0.379094	0.370963	0.370205	0.393399	0.244003	0.370963	0.876792	0.844616	0.103519	0.00396252	0.00873516	0.215191	0.0138072	0.990472	1	0.404195	0.123472	0.0116586	0.904459	0.103519	0.00281779	0.0276496	0.0469691	0.0433412	0.0332676	0.046793	0.12946	0.0543834	0.0420027	0.0333556	0.0600542	0.0593674	0.0598253	0.0264873	0.108098	0.139639	0.0321757	0.0532915	0.00258885	0.00922828	0.114596	0.0228417	0.0532915	0.00399775
original_firstorder_Minimum	0.267021	0.624899	0.673664	0.658151	0.678396	0.698317	0.656511	0.676764	0.689373	0.504015	0.656511	0.615019	0.0931105	0.645204	0.541862	0.465605	0.361118	0.527914	0.43903	0.404195	1	0.812987	0.478972	0.231482	0.645204	0.500652	0.581963	0.872671	0.658906	0.551883	0.439981	0.058029	0.424818	0.44095	0.464654	0.418566	0.418777	0.439629	0.329066	0.0636645	0.0235814	0.0572893	0.875348	0.475344	0.518791	0.148727	0.433324	0.875348	0.507995
original_firstorder_Range	0.247596	0.608996	0.571202	0.562081	0.677322	0.597686	0.626184	0.65327	0.646015	0.48739	0.626184	0.392554	0.232415	0.611585	0.741696	0.680392	0.775369	0.729421	0.144676	0.123472	0.812987	1	0.689285	0.0615512	0.611585	0.711018	0.769187	0.895794	0.818376	0.728241	0.622468	0.0580994	0.602621	0.625955	0.65445	0.595453	0.594907	0.454528	0.315628	0.102339	0.0382339	0.00762566	0.893346	0.708358	0.743017	0.12386	0.6619	0.893346	0.706861
original_firstorder_RobustMeanAbsoluteDeviation	0.0528336	0.388838	0.390282	0.370863	0.438618	0.399479	0.403526	0.417351	0.427776	0.258057	0.403526	0.387359	0.456712	0.448258	0.986193	0.998133	0.72169	0.99123	0.0124159	0.0116586	0.478972	0.689285	1	0.102233	0.448258	0.996249	0.965517	0.566482	0.864869	0.954035	0.723627	0.186996	0.708112	0.736466	0.744514	0.700486	0.704167	0.0124159	0.101969	0.0354866	0.196876	0.0295868	0.557043	0.946444	0.949051	0.141753	0.910394	0.557043	0.979465
original_firstorder_RootMeanSquared	0.177081	0.339245	0.221091	0.254619	0.291065	0.22104	0.317601	0.324434	0.317301	0.264221	0.317601	0.730425	0.86309	0.0595787	0.0883907	0.100296	0.267444	0.105086	0.899845	0.904459	0.231482	0.0615512	0.102233	1	0.0595787	0.0970554	0.121288	0.000176112	0.115864	0.11317	0.107869	0.0205171	0.0975837	0.108485	0.122451	0.0898876	0.0908386	0.139586	0.120831	0.0193371	0.0285654	0.0465993	0.00489592	0.11442	0.100243	0.0116938	0.15681	0.00489592	0.0834948
original_firstorder_TotalEnergy	0.216389	0.847593	0.863513	0.890509	0.791351	0.868602	0.895407	0.842027	0.883026	0.738403	0.895407	0.284773	0.149378	1	0.480311	0.434662	0.485647	0.46469	0.107305	0.103519	0.645204	0.611585	0.448258	0.0595787	1	0.46749	0.477722	0.624053	0.555405	0.51777	0.273132	0.239196	0.256155	0.278116	0.298862	0.243422	0.246592	0.387729	0.298809	0.141735	0.225142	0.068085	0.622962	0.390969	0.423761	0.273168	0.377003	0.622962	0.51784
original_firstorder_Uniformity	0.0663414	0.413635	0.405674	0.388017	0.463847	0.416615	0.42672	0.442253	0.452908	0.269786	0.42672	0.396499	0.454968	0.46749	0.994576	0.993237	0.730548	0.994629	0.0196893	0.00281779	0.500652	0.711018	0.996249	0.0970554	0.46749	1	0.973301	0.588338	0.878447	0.956941	0.745095	0.165369	0.72995	0.757687	0.765788	0.722289	0.7256	0.0130499	0.106583	0.0101793	0.174281	0.0333733	0.579849	0.954704	0.961308	0.123648	0.916875	0.579849	0.982477
original_firstorder_Variance	0.0848332	0.412965	0.423074	0.393952	0.511443	0.450393	0.426068	0.465147	0.463492	0.258656	0.426068	0.381424	0.465922	0.477722	0.983217	0.957275	0.718643	0.988077	0.00796027	0.0276496	0.581963	0.769187	0.965517	0.121288	0.477722	0.973301	1	0.68048	0.944102	0.974781	0.73076	0.19043	0.711775	0.743651	0.75811	0.703638	0.706174	0.116269	0.00232468	0.0170477	0.182734	0.00272974	0.673013	0.925452	0.942728	0.177292	0.877479	0.673013	0.959089
original_glcm_Autocorrelation	0.273344	0.595858	0.557501	0.542497	0.670436	0.592517	0.615001	0.651351	0.633546	0.507696	0.615001	0.29932	0.23835	0.624053	0.629654	0.552288	0.542161	0.621112	0.0828255	0.0469691	0.872671	0.895794	0.566482	0.000176112	0.624053	0.588338	0.68048	1	0.772217	0.650382	0.46793	0.12312	0.44817	0.473759	0.502483	0.440051	0.440368	0.517224	0.406256	0.0198831	0.0907682	0.120831	0.999524	0.560583	0.603166	0.229492	0.516044	0.999524	0.596897
original_glcm_ClusterProminence	0.15873	0.493061	0.484168	0.466098	0.595426	0.518426	0.510162	0.555916	0.539977	0.355447	0.510162	0.338294	0.440421	0.555405	0.902504	0.850252	0.686344	0.907048	0.0012504	0.0433412	0.658906	0.818376	0.864869	0.115864	0.555405	0.878447	0.944102	0.772217	1	0.955074	0.576644	0.355113	0.550192	0.585996	0.616111	0.54077	0.54114	0.341235	0.234141	0.177662	0.336075	0.0106548	0.764239	0.79092	0.82498	0.380825	0.734317	0.764239	0.906079
original_glcm_ClusterTendency	0.110739	0.457205	0.463193	0.442252	0.548878	0.490917	0.474517	0.513296	0.5031	0.31753	0.474517	0.366701	0.456078	0.51777	0.960797	0.944384	0.687929	0.970466	0.00452608	0.0332676	0.551883	0.728241	0.954035	0.11317	0.51777	0.956941	0.974781	0.650382	0.955074	1	0.602057	0.366454	0.581276	0.615582	0.632066	0.572541	0.575535	0.206738	0.102427	0.197633	0.359093	0.00362791	0.640432	0.863161	0.88116	0.341922	0.81038	0.640432	0.978004
original_glcm_Contrast	0.0424959	0.182135	0.221391	0.189614	0.251755	0.231607	0.196295	0.214962	0.226181	0.0712021	0.196295	0.329365	0.331179	0.273132	0.747966	0.731482	0.614579	0.734564	0.0407347	0.046793	0.439981	0.622468	0.723627	0.107869	0.273132	0.745095	0.73076	0.46793	0.576644	0.602057	1	0.466275	0.997799	0.998503	0.99558	0.995809	0.995879	0.309253	0.446814	0.599873	0.459494	0.145345	0.46867	0.892043	0.885157	0.463686	0.903385	0.46867	0.638424
original_glcm_Correlation	0.152601	0.257723	0.20702	0.227823	0.259768	0.216444	0.263534	0.269557	0.244056	0.276848	0.263534	0.0193899	0.101934	0.239196	0.167254	0.169015	0.0387447	0.188193	0.0838998	0.12946	0.058029	0.0580994	0.186996	0.0205171	0.239196	0.165369	0.19043	0.12312	0.355113	0.366454	0.466275	1	0.485418	0.451076	0.429872	0.493519	0.49049	0.609418	0.647142	0.971787	0.993642	0.017893	0.110686	0.0907154	0.0634884	0.962699	0.155084	0.110686	0.31554
original_glcm_DifferenceAverage	0.0358036	0.175126	0.208957	0.178651	0.244243	0.220635	0.185129	0.206315	0.216688	0.059385	0.185129	0.329083	0.31915	0.256155	0.731781	0.716336	0.595541	0.717657	0.0466697	0.0543834	0.424818	0.602621	0.708112	0.0975837	0.256155	0.72995	0.711775	0.44817	0.550192	0.581276	0.997799	0.485418	1	0.996689	0.989046	0.99919	0.999313	0.336304	0.474587	0.617097	0.478356	0.159698	0.449421	0.883907	0.875401	0.486862	0.895689	0.449421	0.620725
original_glcm_DifferenceEntropy	0.0373182	0.191469	0.226604	0.194466	0.259152	0.237736	0.203392	0.22162	0.235251	0.0722412	0.203392	0.33021	0.337713	0.278116	0.761227	0.743686	0.619298	0.748019	0.0377056	0.0420027	0.44095	0.625955	0.736466	0.108485	0.278116	0.757687	0.743651	0.473759	0.585996	0.615582	0.998503	0.451076	0.996689	1	0.995509	0.993871	0.99447	0.30522	0.443855	0.586665	0.444701	0.136945	0.474059	0.899845	0.894016	0.451622	0.907101	0.474059	0.651615
original_glcm_DifferenceVariance	0.0277201	0.201173	0.235832	0.204364	0.265536	0.246225	0.216301	0.229738	0.244479	0.0901166	0.216301	0.326776	0.349917	0.298862	0.770543	0.751065	0.640361	0.758004	0.0294812	0.0333556	0.464654	0.65445	0.744514	0.122451	0.298862	0.765788	0.75811	0.502483	0.616111	0.632066	0.99558	0.429872	0.989046	0.995509	1	0.985242	0.985295	0.266493	0.403385	0.568103	0.423338	0.125762	0.502254	0.900655	0.897379	0.423796	0.907841	0.502254	0.66389
original_glcm_Id	0.0351168	0.166391	0.198936	0.169388	0.238801	0.211706	0.175214	0.198179	0.207619	0.0510373	0.175214	0.331654	0.312353	0.243422	0.723522	0.70901	0.587404	0.70945	0.0519179	0.0600542	0.418566	0.595453	0.700486	0.0898876	0.243422	0.722289	0.703638	0.440051	0.54077	0.572541	0.995809	0.493519	0.99919	0.993871	0.985242	1	0.999806	0.343841	0.481931	0.624511	0.486316	0.169561	0.441478	0.879733	0.869994	0.495703	0.892607	0.441478	0.612219
original_glcm_Idm	0.0341834	0.169349	0.201965	0.171994	0.240228	0.214313	0.178278	0.200398	0.210049	0.0549294	0.178278	0.332112	0.313568	0.246592	0.726568	0.712832	0.588813	0.712726	0.0514424	0.0593674	0.418777	0.594907	0.704167	0.0908386	0.246592	0.7256	0.706174	0.440368	0.54114	0.575535	0.995879	0.49049	0.999313	0.99447	0.985295	0.999806	1	0.344229	0.482336	0.621553	0.483375	0.166655	0.441707	0.882163	0.872248	0.493484	0.894931	0.441707	0.615618
original_glcm_Idmn	0.214522	0.413687	0.409919	0.419198	0.49192	0.435494	0.450741	0.48304	0.439012	0.45326	0.450741	0.0601775	0.0947483	0.387729	0.0461942	0.00639287	0.203955	0.0543306	0.0934803	0.0598253	0.439629	0.454528	0.0124159	0.139586	0.387729	0.0130499	0.116269	0.517224	0.341235	0.206738	0.309253	0.609418	0.336304	0.30522	0.266493	0.343841	0.344229	1	0.980592	0.555246	0.576274	0.0640872	0.513772	0.132877	0.088514	0.711018	0.178789	0.513772	0.120919
original_glcm_Idn	0.177451	0.322232	0.330703	0.334769	0.395125	0.350651	0.357191	0.391656	0.342344	0.381547	0.357191	0.0156211	0.122521	0.298809	0.0769258	0.119862	0.0838998	0.063189	0.060565	0.0264873	0.329066	0.315628	0.101969	0.120831	0.298809	0.106583	0.00232468	0.406256	0.234141	0.102427	0.446814	0.647142	0.474587	0.443855	0.403385	0.481931	0.482336	0.980592	1	0.617731	0.612782	0.118101	0.402786	0.266141	0.225036	0.749128	0.308725	0.402786	0.00903455
original_glcm_Imc1	0.123208	0.182575	0.118471	0.149733	0.148187	0.11406	0.184513	0.170794	0.151404	0.231922	0.184513	0.0719946	0.0124335	0.141735	0.00672748	0.0185798	0.0942552	0.0250255	0.0715191	0.108098	0.0636645	0.102339	0.0354866	0.0193371	0.141735	0.0101793	0.0170477	0.0198831	0.177662	0.197633	0.599873	0.971787	0.617097	0.586665	0.568103	0.624511	0.621553	0.555246	0.617731	1	0.973178	0.0495403	0.0311014	0.247825	0.223733	0.93144	0.302772	0.0311014	0.16146
original_glcm_Imc2	0.139375	0.243669	0.180938	0.209066	0.225645	0.185421	0.246997	0.241362	0.224543	0.261914	0.246997	0.0302208	0.111056	0.225142	0.17347	0.179282	0.0536966	0.190659	0.0988694	0.139639	0.0235814	0.0382339	0.196876	0.0285654	0.225142	0.174281	0.182734	0.0907682	0.336075	0.359093	0.459494	0.993642	0.478356	0.444701	0.423338	0.486316	0.483375	0.576274	0.612782	0.973178	1	0.0462118	0.0778768	0.0821035	0.0568314	0.949033	0.145116	0.0778768	0.325121
original_glcm_InverseVariance	0.0205875	0.125938	0.100859	0.0913246	0.111405	0.0949605	0.121817	0.111937	0.121095	0.0680145	0.121817	0.00725582	0.00919305	0.068085	0.0267514	0.0383044	0.0426191	0.0157268	0.0391145	0.0321757	0.0572893	0.00762566	0.0295868	0.0465993	0.068085	0.0333733	0.00272974	0.120831	0.0106548	0.00362791	0.145345	0.017893	0.159698	0.136945	0.125762	0.169561	0.166655	0.0640872	0.118101	0.0495403	0.0462118	1	0.122521	0.0817689	0.0701455	0.0384101	0.10609	0.122521	0.0406995
original_glcm_JointAverage	0.273925	0.596492	0.557008	0.542638	0.671422	0.592482	0.614491	0.65121	0.633211	0.506833	0.614491	0.301451	0.23002	0.622962	0.62194	0.542813	0.535733	0.612518	0.0889014	0.0532915	0.875348	0.893346	0.557043	0.00489592	0.622962	0.579849	0.673013	0.999524	0.764239	0.640432	0.46867	0.110686	0.449421	0.474059	0.502254	0.441478	0.441707	0.513772	0.402786	0.0311014	0.0778768	0.122521	1	0.555053	0.597918	0.219136	0.510778	1	0.586929
original_glcm_JointEnergy	0.0109366	0.32461	0.334173	0.305375	0.393839	0.343941	0.337519	0.358089	0.364957	0.196312	0.337519	0.364675	0.449967	0.390969	0.947536	0.950442	0.730918	0.944278	0.00653376	0.00258885	0.475344	0.708358	0.946444	0.11442	0.390969	0.954704	0.925452	0.560583	0.79092	0.863161	0.892043	0.0907154	0.883907	0.899845	0.900655	0.879733	0.882163	0.132877	0.266141	0.247825	0.0821035	0.0817689	0.555053	1	0.994611	0.12076	0.982354	0.555053	0.896481
original_glcm_JointEntropy	0.0381283	0.366172	0.366243	0.340035	0.432559	0.378037	0.377391	0.396745	0.407171	0.223345	0.377391	0.38403	0.439752	0.423761	0.961343	0.949685	0.7371	0.954334	0.0213096	0.00922828	0.518791	0.743017	0.949051	0.100243	0.423761	0.961308	0.942728	0.603166	0.82498	0.88116	0.885157	0.0634884	0.875401	0.894016	0.897379	0.869994	0.872248	0.088514	0.225036	0.223733	0.0568314	0.0701455	0.597918	0.994611	1	0.0865767	0.967701	0.597918	0.909566
original_glcm_MCC	0.166496	0.289898	0.234352	0.259039	0.303763	0.252485	0.298017	0.311542	0.276901	0.31311	0.298017	0.0250255	0.0831249	0.273168	0.135959	0.120813	0.038868	0.157022	0.0672748	0.114596	0.148727	0.12386	0.141753	0.0116938	0.273168	0.123648	0.177292	0.229492	0.380825	0.341922	0.463686	0.962699	0.486862	0.451622	0.423796	0.495703	0.493484	0.711018	0.749128	0.93144	0.949033	0.0384101	0.219136	0.12076	0.0865767	1	0.18328	0.219136	0.270508
original_glcm_MaximumProbability	0.0226832	0.277341	0.309359	0.281159	0.346736	0.314944	0.298299	0.317442	0.318305	0.185111	0.298299	0.328203	0.458402	0.377003	0.901483	0.917985	0.709168	0.900638	0.0230883	0.0228417	0.433324	0.6619	0.910394	0.15681	0.377003	0.916875	0.877479	0.516044	0.734317	0.81038	0.903385	0.155084	0.895689	0.907101	0.907841	0.892607	0.894931	0.178789	0.308725	0.302772	0.145116	0.10609	0.510778	0.982354	0.967701	0.18328	1	0.510778	0.849019
original_glcm_SumAverage	0.273925	0.596492	0.557008	0.542638	0.671422	0.592482	0.614491	0.65121	0.633211	0.506833	0.614491	0.301451	0.23002	0.622962	0.62194	0.542813	0.535733	0.612518	0.0889014	0.0532915	0.875348	0.893346	0.557043	0.00489592	0.622962	0.579849	0.673013	0.999524	0.764239	0.640432	0.46867	0.110686	0.449421	0.474059	0.502254	0.441478	0.441707	0.513772	0.402786	0.0311014	0.0778768	0.122521	1	0.555053	0.597918	0.219136	0.510778	1	0.586929
original_glcm_SumEntropy	0.0996266	0.468811	0.448593	0.438985	0.507886	0.45875	0.484379	0.496178	0.504614	0.329312	0.484379	0.392061	0.441302	0.51784	0.98017	0.972703	0.721003	0.979131	0.0224895	0.00399775	0.507995	0.706861	0.979465	0.0834948	0.51784	0.982477	0.959089	0.596897	0.906079	0.978004	0.638424	0.31554	0.620725	0.651615	0.66389	0.612219	0.615618	0.120919	0.00903455	0.16146	0.325121	0.0406995	0.586929	0.896481	0.909566	0.270508	0.849019	0.586929	1
original_glcm_SumSquares	0.0599662	0.404512	0.42045	0.389708	0.490441	0.438453	0.421243	0.454105	0.454	0.25774	0.421243	0.377109	0.470061	0.473495	0.989433	0.973742	0.721848	0.993501	0.00422669	0.0252545	0.545032	0.746381	0.979095	0.124952	0.473495	0.986158	0.992075	0.641348	0.923374	0.970977	0.759607	0.161953	0.741749	0.771037	0.783347	0.733683	0.73629	0.0627664	0.0561093	0.00743193	0.158712	0.0233172	0.633352	0.94861	0.96034	0.140784	0.908105	0.633352	0.968177
original_gldm_DependenceEntropy	0.191311	0.534254	0.459582	0.486959	0.504548	0.463831	0.547392	0.530732	0.526716	0.491617	0.547392	0.237258	0.213166	0.528636	0.597267	0.589218	0.41323	0.601194	0.0187736	0.015128	0.338135	0.427459	0.606706	0.0189849	0.528636	0.597355	0.581399	0.403984	0.664101	0.713166	0.000634004	0.82336	0.0224543	0.0173647	0.0382339	0.0336903	0.029534	0.510496	0.465658	0.740992	0.836357	0.0659892	0.390758	0.373534	0.402592	0.776972	0.30714	0.390758	0.71424
original_gldm_DependenceNonUniformity	0.299708	0.955778	0.883431	0.913615	0.908761	0.890642	0.98489	0.953911	0.97626	0.808865	0.98489	0.512381	0.0772252	0.898313	0.524215	0.471399	0.459987	0.500194	0.37128	0.370346	0.703198	0.694604	0.482512	0.296256	0.898313	0.507326	0.506622	0.661178	0.565232	0.533268	0.321704	0.181889	0.311507	0.327727	0.338752	0.30212	0.305097	0.386989	0.279261	0.0858723	0.164172	0.0997323	0.661125	0.444754	0.482107	0.214029	0.407259	0.661125	0.546089
original_gldm_DependenceNonUniformityNormalized	0.0758163	0.0456483	0.0965623	0.0639563	0.12353	0.108565	0.0477264	0.0757811	0.0877038	0.0737382	0.0477264	0.311331	0.29018	0.124458	0.644782	0.643144	0.497763	0.633528	0.0548237	0.0669226	0.319908	0.476507	0.631785	0.0930929	0.124458	0.650999	0.623596	0.31665	0.447607	0.494875	0.958578	0.543852	0.967507	0.953806	0.939136	0.972509	0.971593	0.449914	0.576521	0.665475	0.535627	0.228523	0.318006	0.826019	0.805678	0.560688	0.849248	0.318006	0.536684
original_gldm_DependenceVariance	0.0654257	0.046793	0.0923884	0.061702	0.120809	0.105598	0.0473566	0.0748124	0.0869642	0.0706738	0.0473566	0.308425	0.284967	0.121711	0.636804	0.634972	0.495069	0.624406	0.0550879	0.0692121	0.320084	0.477017	0.623631	0.0879152	0.121711	0.643179	0.614948	0.3179	0.439734	0.485893	0.953348	0.548607	0.963157	0.9481	0.93269	0.96874	0.967578	0.445018	0.572787	0.670124	0.54084	0.238526	0.319415	0.819696	0.799215	0.565866	0.845162	0.319415	0.529041
original_gldm_GrayLevelNonUniformity	0.336621	0.948716	0.848385	0.892526	0.860064	0.852848	0.973742	0.927706	0.945282	0.849635	0.973742	0.424501	0.227238	0.85358	0.258867	0.201032	0.256014	0.235902	0.392642	0.398964	0.597601	0.513296	0.216371	0.361523	0.85358	0.240147	0.247895	0.538551	0.355465	0.300817	0.0529569	0.235814	0.0452256	0.058117	0.068807	0.0363319	0.0389208	0.478197	0.40342	0.184178	0.215544	0.148868	0.540206	0.1563	0.196823	0.283065	0.125462	0.540206	0.303864
original_gldm_GrayLevelVariance	0.0846571	0.414269	0.424307	0.394727	0.511567	0.450922	0.427125	0.46682	0.464144	0.259713	0.427125	0.3788	0.466785	0.479131	0.982811	0.956958	0.712972	0.988148	0.0061287	0.029446	0.580219	0.76489	0.965288	0.122768	0.479131	0.97309	0.999648	0.678859	0.945652	0.976383	0.727273	0.196805	0.708165	0.740182	0.754623	0.699764	0.702318	0.114719	0.00255363	0.0234405	0.188916	0.00378641	0.671375	0.923673	0.941055	0.183403	0.875084	0.671375	0.95997
original_gldm_HighGrayLevelEmphasis	0.279067	0.594766	0.551354	0.53606	0.665804	0.586767	0.612095	0.646332	0.62946	0.506041	0.612095	0.29763	0.247261	0.624106	0.637649	0.56104	0.55352	0.628844	0.0777007	0.0432531	0.870875	0.901095	0.575059	0.00577648	0.624106	0.597126	0.687172	0.999067	0.775052	0.655613	0.480874	0.11523	0.461238	0.486387	0.515022	0.45333	0.4537	0.508577	0.395706	0.0290761	0.0834948	0.111268	0.99875	0.572717	0.614543	0.220211	0.529147	0.99875	0.604012
original_gldm_LargeDependenceEmphasis	0.100789	0.030485	0.0974957	0.0676723	0.124015	0.114571	0.0385686	0.0738438	0.0901342	0.108784	0.0385686	0.30728	0.304146	0.122821	0.660843	0.650453	0.522437	0.647688	0.04077	0.0476383	0.333574	0.498028	0.64052	0.114138	0.122821	0.661424	0.641136	0.336814	0.465482	0.504579	0.969022	0.542478	0.976665	0.966222	0.952767	0.980064	0.979254	0.433113	0.560653	0.667218	0.53318	0.213201	0.338294	0.830968	0.815223	0.556021	0.849037	0.338294	0.545437
original_gldm_LargeDependenceHighGrayLevelEmphasis	0.274541	0.500247	0.4767	0.46962	0.57246	0.50542	0.532422	0.571114	0.518791	0.54283	0.532422	0.0749886	0.0110246	0.500757	0.150312	0.0793914	0.125092	0.155525	0.0507731	0.00558276	0.595893	0.499067	0.101793	0.0685781	0.500757	0.108591	0.228241	0.701736	0.437216	0.296344	0.193001	0.548308	0.218731	0.184865	0.149766	0.229879	0.228682	0.892554	0.86656	0.475908	0.507819	0.125973	0.700398	0.0308548	0.0208517	0.662833	0.0836885	0.700398	0.199095
original_gldm_SmallDependenceEmphasis	0.164313	0.0736677	0.0286006	0.00237756	0.0389929	0.0576332	0.0648797	0.0208165	0.0186679	0.279701	0.0648797	0.220757	0.288049	0.0388151	0.557976	0.529781	0.463809	0.543394	0.00663943	0.00609348	0.252175	0.41721	0.525114	0.163837	0.0388151	0.546177	0.546089	0.272657	0.374168	0.394667	0.873833	0.569793	0.881441	0.877444	0.865204	0.882674	0.881529	0.440456	0.541809	0.687313	0.560723	0.14089	0.274858	0.715561	0.706034	0.576609	0.722289	0.274858	0.427407
original_gldm_SmallDependenceHighGrayLevelEmphasis	0.0990102	0.362456	0.36059	0.338414	0.457471	0.392813	0.370364	0.409707	0.419235	0.19478	0.370364	0.332817	0.29659	0.409126	0.728294	0.666091	0.652989	0.711176	0.067768	0.0508436	0.707231	0.859322	0.67141	0.0441513	0.409126	0.696559	0.747173	0.807439	0.705294	0.635782	0.824487	0.252633	0.815822	0.828713	0.843049	0.812546	0.811261	0.113892	0.0245853	0.409919	0.260699	0.0595611	0.808936	0.786077	0.809693	0.183932	0.75693	0.808936	0.631168
original_glrlm_GrayLevelNonUniformity	0.327093	0.963122	0.873217	0.915148	0.885637	0.879582	0.988852	0.948505	0.969427	0.837237	0.988852	0.475608	0.178631	0.880843	0.365362	0.308901	0.348033	0.340513	0.400092	0.405974	0.64568	0.594625	0.322003	0.345356	0.880843	0.34791	0.348649	0.583107	0.430964	0.387059	0.186503	0.176288	0.179124	0.190694	0.200081	0.1706	0.173189	0.419129	0.326353	0.103483	0.158413	0.103483	0.58471	0.283188	0.321352	0.218326	0.253179	0.58471	0.39789
original_glrlm_GrayLevelNonUniformityNormalized	0.0975485	0.449139	0.430946	0.416063	0.498217	0.445532	0.460163	0.475732	0.488236	0.293473	0.460163	0.416593	0.437128	0.491705	0.996988	0.978426	0.722905	0.99447	0.0401536	0.0125744	0.545138	0.735444	0.985453	0.077912	0.491705	0.992498	0.983058	0.62939	0.906238	0.965869	0.723522	0.197563	0.706509	0.737611	0.748318	0.697351	0.700697	0.0634532	0.0574654	0.040453	0.202053	0.00044028	0.621429	0.934469	0.949526	0.164277	0.887394	0.621429	0.982213
original_glrlm_GrayLevelVariance	0.128632	0.464144	0.461942	0.436916	0.563425	0.495029	0.477229	0.516731	0.513349	0.307228	0.477229	0.374626	0.457927	0.525994	0.965271	0.924976	0.712145	0.968229	0.00898172	0.0292522	0.634761	0.804234	0.936512	0.118277	0.525994	0.947924	0.990772	0.738879	0.967648	0.97235	0.688211	0.233349	0.666919	0.701736	0.720633	0.657708	0.659998	0.195608	0.0776126	0.0585397	0.22058	0.0393611	0.731711	0.88632	0.912789	0.234669	0.832007	0.731711	0.944947
original_glrlm_HighGrayLevelRunEmphasis	0.279825	0.593938	0.549928	0.534061	0.662396	0.584583	0.610563	0.641841	0.627135	0.506252	0.610563	0.288172	0.261949	0.627188	0.644342	0.569564	0.570691	0.635624	0.0657251	0.032704	0.866577	0.907083	0.583248	0.0177697	0.627188	0.605016	0.692825	0.997446	0.777923	0.661812	0.487179	0.115794	0.467402	0.492956	0.521521	0.459406	0.459846	0.508753	0.394121	0.0294812	0.0848861	0.107816	0.996918	0.58191	0.622979	0.218502	0.538498	0.996918	0.61169
original_glrlm_LongRunEmphasis	0.14494	0.0402592	0.0469867	0.0101883	0.0725174	0.0671962	0.0318587	0.0121165	0.0367018	0.208587	0.0318587	0.266422	0.345109	0.0658836	0.655525	0.641806	0.516044	0.643637	0.00269452	0.00299391	0.301169	0.473583	0.633423	0.15526	0.0658836	0.651703	0.640168	0.324416	0.469198	0.505636	0.920397	0.495175	0.927424	0.921472	0.908686	0.930383	0.929203	0.420362	0.539925	0.628844	0.484555	0.24189	0.324293	0.810961	0.794301	0.515498	0.819784	0.324293	0.54283
original_glrlm_LongRunHighGrayLevelEmphasis	0.315699	0.573844	0.532686	0.525378	0.636911	0.559663	0.603801	0.639322	0.589183	0.607059	0.603801	0.146701	0.0103202	0.573562	0.242225	0.167553	0.19596	0.242559	0.0909443	0.048607	0.697298	0.59621	0.188968	0.0831602	0.573562	0.201455	0.315558	0.799215	0.497693	0.357191	0.0427953	0.415026	0.0675918	0.0369483	0.00353985	0.0784404	0.0770843	0.810767	0.764556	0.339668	0.371685	0.217481	0.799672	0.0896235	0.140802	0.533091	0.0432179	0.799672	0.268254
original_glrlm_RunEntropy	0.284439	0.580835	0.472051	0.504024	0.538566	0.477717	0.588672	0.560019	0.557518	0.561657	0.588672	0.230584	0.139393	0.550315	0.47346	0.445458	0.299549	0.478373	0.0673805	0.0250255	0.398366	0.40018	0.467366	0.0681554	0.550315	0.460199	0.485682	0.457328	0.626237	0.618735	0.143619	0.862227	0.171075	0.126642	0.0976894	0.183738	0.179916	0.639745	0.612606	0.801592	0.853545	0.130922	0.446691	0.216019	0.256402	0.851643	0.144359	0.446691	0.587827
original_glrlm_RunLengthNonUniformity	0.288824	0.946233	0.878183	0.909591	0.902007	0.888009	0.974217	0.946444	0.971135	0.785971	0.974217	0.512504	0.0530098	0.89671	0.555105	0.498133	0.493854	0.529622	0.357913	0.356028	0.714751	0.720757	0.509158	0.275704	0.89671	0.535768	0.535575	0.678155	0.585062	0.552622	0.371966	0.151087	0.362351	0.378483	0.387869	0.352929	0.355887	0.364218	0.249093	0.0478673	0.135184	0.0707619	0.678384	0.482389	0.519725	0.183703	0.44456	0.678384	0.567944
original_glrlm_RunLengthNonUniformityNormalized	0.116798	0.0396957	0.115917	0.0861556	0.144392	0.135097	0.0518826	0.0918425	0.107745	0.109964	0.0518826	0.307175	0.300711	0.138776	0.66308	0.646754	0.527245	0.649449	0.03959	0.0438871	0.34481	0.50951	0.63779	0.117696	0.138776	0.660051	0.646226	0.353668	0.47309	0.504843	0.97235	0.546265	0.978373	0.970572	0.95849	0.980258	0.979606	0.418531	0.545648	0.671287	0.537459	0.193142	0.3555	0.827287	0.815364	0.552816	0.842538	0.3555	0.542883
original_glrlm_RunPercentage	0.119369	0.0217322	0.0983586	0.0669238	0.126806	0.116121	0.0328801	0.0722764	0.0882146	0.121799	0.0328801	0.30161	0.3092	0.118858	0.664066	0.652108	0.528248	0.651263	0.0338488	0.0386214	0.330422	0.500581	0.642246	0.121253	0.118858	0.663309	0.645645	0.338505	0.470466	0.508013	0.969268	0.539379	0.976137	0.967137	0.953929	0.978972	0.978197	0.426702	0.554172	0.664682	0.529833	0.206086	0.339826	0.831672	0.816667	0.551337	0.847681	0.339826	0.547304
original_glrlm_RunVariance	0.152742	0.0730513	0.0137015	0.0224899	0.039671	0.0324666	0.0664295	0.0221373	0.000704449	0.232028	0.0664295	0.251788	0.341939	0.0294812	0.627382	0.6215	0.490384	0.617572	0.00873516	0.00732627	0.264362	0.435684	0.61132	0.157057	0.0294812	0.627646	0.610634	0.283453	0.435895	0.478514	0.907471	0.512997	0.916488	0.907259	0.892519	0.920908	0.919482	0.455373	0.571871	0.64008	0.500916	0.253778	0.283294	0.793015	0.772199	0.53635	0.806699	0.283294	0.517241
original_glrlm_ShortRunEmphasis	0.11435	0.0392202	0.114614	0.0835667	0.143696	0.134507	0.0502624	0.0914198	0.109559	0.119034	0.0502624	0.302455	0.31355	0.138759	0.674932	0.65556	0.534483	0.660984	0.0303265	0.03207	0.349248	0.51821	0.647564	0.126572	0.138759	0.66986	0.658818	0.36545	0.488271	0.51777	0.969744	0.528213	0.975327	0.969673	0.958684	0.976683	0.976049	0.407154	0.534042	0.65873	0.519795	0.196453	0.366894	0.833363	0.822497	0.536473	0.844986	0.366894	0.554877
original_glrlm_ShortRunHighGrayLevelEmphasis	0.245588	0.559737	0.525114	0.5059	0.632226	0.55821	0.573703	0.606407	0.597408	0.451763	0.573703	0.312	0.284685	0.597408	0.699429	0.627523	0.618171	0.688123	0.066905	0.0379522	0.856046	0.929361	0.6386	0.0273326	0.597408	0.661671	0.738843	0.981226	0.793456	0.690395	0.591737	0.0369483	0.573914	0.597214	0.622997	0.566799	0.567116	0.419059	0.294143	0.11604	0.0119756	0.0615336	0.981033	0.66308	0.701666	0.131292	0.620971	0.981033	0.652214
original_glszm_GrayLevelNonUniformity	0.238579	0.853616	0.849371	0.868046	0.839361	0.868003	0.883572	0.867299	0.909091	0.646472	0.883572	0.515234	0.118154	0.836269	0.455919	0.398419	0.435701	0.430083	0.396235	0.400638	0.70392	0.673964	0.406326	0.2657	0.836269	0.435719	0.444014	0.616498	0.457839	0.415906	0.447783	0.0990455	0.446251	0.451516	0.453683	0.439347	0.441073	0.229633	0.112518	0.199958	0.120619	0.0685428	0.620831	0.453242	0.482283	0.0561446	0.43077	0.620831	0.427847
original_glszm_GrayLevelVariance	0.1908	0.504931	0.476014	0.45893	0.593304	0.509937	0.516326	0.552429	0.543007	0.377303	0.516326	0.396693	0.356345	0.536702	0.882938	0.822092	0.74462	0.875542	0.0765031	0.0427776	0.748882	0.917333	0.832641	0.03642	0.536702	0.852876	0.914145	0.836533	0.935578	0.879997	0.691874	0.151492	0.668627	0.698197	0.727678	0.661759	0.661477	0.317935	0.185182	0.0256772	0.137825	0.0312247	0.832535	0.823624	0.857367	0.180638	0.767919	0.832535	0.851643
original_glszm_HighGrayLevelZoneEmphasis	0.249745	0.603202	0.563876	0.55154	0.67033	0.593715	0.615741	0.645116	0.638812	0.479078	0.615741	0.318992	0.265648	0.62946	0.684125	0.615741	0.649008	0.67148	0.0885668	0.0662006	0.837448	0.933799	0.626431	0.00649854	0.62946	0.650153	0.716178	0.955585	0.780494	0.684249	0.561023	0.0708499	0.545173	0.564527	0.587281	0.540101	0.539819	0.45414	0.326248	0.0765031	0.0478144	0.0618506	0.95532	0.647564	0.684583	0.15998	0.602797	0.95532	0.651914
original_glszm_LargeAreaEmphasis	0.318287	0.798528	0.687559	0.730385	0.688233	0.675238	0.821651	0.76917	0.757229	0.838558	0.821651	0.237998	0.297753	0.693283	0.00398013	0.0299038	0.020975	0.0070621	0.29962	0.30448	0.37577	0.251682	0.015991	0.345462	0.693283	0.00496636	0.0014089	0.335282	0.155489	0.106988	0.283241	0.453753	0.293086	0.279701	0.266158	0.300835	0.297753	0.601881	0.57911	0.449579	0.435314	0.0961044	0.335406	0.14015	0.103149	0.500704	0.166479	0.335406	0.0956641
original_glszm_LargeAreaHighGrayLevelEmphasis	0.306365	0.831408	0.782484	0.79074	0.83893	0.797223	0.870857	0.877179	0.83884	0.820876	0.870857	0.307914	0.154644	0.773097	0.234106	0.174791	0.203057	0.229562	0.28141	0.264415	0.650329	0.552886	0.192086	0.269416	0.773097	0.209996	0.276355	0.661953	0.436881	0.347945	0.0415096	0.399193	0.0576063	0.0358388	0.0152689	0.0671516	0.0643866	0.709116	0.651104	0.328977	0.360325	0.157145	0.662076	0.100173	0.144711	0.4798	0.0620091	0.662076	0.289106
original_glszm_SizeZoneNonUniformity	0.192579	0.776584	0.78141	0.786953	0.8182	0.813918	0.805009	0.814889	0.855553	0.52617	0.805009	0.477246	0.0538551	0.782625	0.634462	0.568913	0.595717	0.610299	0.280335	0.272534	0.718661	0.795094	0.580466	0.156282	0.782625	0.609313	0.631961	0.706139	0.629249	0.590786	0.56775	0.0486598	0.560565	0.575675	0.58427	0.553926	0.554383	0.25531	0.126994	0.188088	0.0641224	0.0470219	0.708288	0.621148	0.652566	0.0164841	0.581346	0.708288	0.596016
original_glszm_SizeZoneNonUniformityNormalized	0.035469	0.05463	0.0212215	0.0358483	0.0174535	0.0210632	0.0670283	0.0348526	0.0187383	0.294477	0.0670283	0.100137	0.169807	0.00598781	0.32859	0.28981	0.32704	0.318393	0.00729104	0.00720299	0.169719	0.309834	0.296027	0.100261	0.00598781	0.310028	0.332641	0.222535	0.230002	0.220492	0.477863	0.363337	0.482142	0.487584	0.4882	0.484573	0.48142	0.181889	0.228946	0.452573	0.361541	0.0177169	0.225212	0.417615	0.412419	0.359533	0.405639	0.225212	0.231975
original_glszm_SmallAreaEmphasis	0.0311542	0.0533972	0.0309429	0.0452352	0.019382	0.0142916	0.0708675	0.0389736	0.0160086	0.298933	0.0708675	0.0948364	0.189479	0.0166074	0.345497	0.305361	0.335335	0.337096	0.018844	0.0211158	0.163503	0.314924	0.313356	0.0968969	0.0166074	0.325843	0.35439	0.232186	0.258621	0.247825	0.451974	0.309728	0.45444	0.463756	0.465605	0.456676	0.453577	0.145856	0.191399	0.402381	0.31082	0.0326688	0.234159	0.418531	0.414198	0.306805	0.400849	0.234159	0.25369
original_glszm_SmallAreaHighGrayLevelEmphasis	0.202828	0.485893	0.443098	0.439416	0.561787	0.486549	0.484185	0.50951	0.533109	0.282396	0.484185	0.296045	0.282484	0.513279	0.676359	0.607147	0.675425	0.663168	0.0634708	0.0440633	0.726392	0.884506	0.619756	0.0172942	0.513279	0.641312	0.704149	0.85115	0.723381	0.639921	0.618136	0.0431651	0.606812	0.625568	0.645046	0.605157	0.60329	0.338171	0.209679	0.203004	0.0596316	0.0131908	0.85122	0.675654	0.702846	0.0283012	0.627135	0.85122	0.61884
original_glszm_ZoneEntropy	0.250925	0.749833	0.668557	0.689588	0.727428	0.660691	0.778909	0.762883	0.742348	0.737734	0.778909	0.376669	0.0247614	0.694516	0.537177	0.487161	0.406273	0.519654	0.209485	0.188863	0.593146	0.608291	0.499665	0.195678	0.694516	0.516801	0.527667	0.595488	0.638001	0.601036	0.167359	0.529675	0.147159	0.175443	0.192737	0.134761	0.138653	0.541756	0.453489	0.451692	0.522542	0.0569899	0.59031	0.372424	0.419076	0.544785	0.317777	0.59031	0.596087
original_glszm_ZonePercentage	0.229421	0.204625	0.0822444	0.117117	0.0794125	0.0546305	0.196929	0.15246	0.107147	0.408809	0.196929	0.155842	0.271336	0.0869642	0.438572	0.412155	0.396517	0.424888	0.0347821	0.0342362	0.161178	0.318006	0.406379	0.184442	0.0869642	0.425557	0.43026	0.176306	0.257881	0.272217	0.785249	0.617449	0.794371	0.788419	0.774348	0.796925	0.795076	0.484802	0.566606	0.71093	0.606178	0.112888	0.179159	0.606143	0.5926	0.623965	0.61722	0.179159	0.30323
original_glszm_ZoneVariance	0.316896	0.801398	0.691628	0.73389	0.693683	0.679808	0.825068	0.773485	0.762002	0.839069	0.825068	0.243739	0.301627	0.69515	0.00746716	0.0281427	0.0210278	0.00431475	0.304498	0.309077	0.379592	0.255222	0.0140185	0.349847	0.69515	0.00237751	0.00487831	0.338047	0.158941	0.109577	0.278099	0.451023	0.287873	0.274383	0.261174	0.295639	0.292593	0.600261	0.576169	0.445176	0.432338	0.0904688	0.338171	0.136381	0.0988165	0.497975	0.163362	0.338171	0.0980592
original_ngtdm_Complexity	0.171251	0.500317	0.482107	0.469779	0.573385	0.507657	0.515938	0.544662	0.538199	0.386108	0.515938	0.386196	0.26327	0.533919	0.765806	0.714628	0.776232	0.750291	0.119844	0.107129	0.760329	0.9565	0.717305	0.0143708	0.533919	0.740675	0.783047	0.839403	0.773361	0.703374	0.783136	0.137773	0.767497	0.782413	0.803212	0.763076	0.762284	0.259343	0.111849	0.295234	0.148163	0.0435173	0.839227	0.797313	0.821158	0.0748653	0.773661	0.839227	0.701208
original_ngtdm_Contrast	0.21609	0.234282	0.164894	0.221984	0.168441	0.165873	0.249868	0.215544	0.210401	0.341763	0.249868	0.0484308	0.402557	0.163045	0.470783	0.509704	0.127135	0.486897	0.167218	0.175883	0.12349	0.0451728	0.501338	0.267567	0.163045	0.494981	0.451182	0.102515	0.247737	0.385052	0.545965	0.266863	0.555475	0.555194	0.531524	0.556233	0.558346	0.718837	0.74617	0.313251	0.252492	0.0205347	0.10616	0.554683	0.526029	0.367757	0.548748	0.10616	0.403561
[truncated: 39 more columns]

## Sheet: SUBSET
	original_shape_Flatness	original_shape_LeastAxisLength	original_shape_MajorAxisLength	original_shape_Maximum2DDiameterColumn	original_shape_Maximum2DDiameterSlice	original_shape_Maximum3DDiameter	original_shape_MeshVolume	original_shape_MinorAxisLength	original_shape_SurfaceArea	original_shape_SurfaceVolumeRatio	original_shape_VoxelVolume	original_firstorder_10Percentile	original_firstorder_90Percentile	original_firstorder_Energy	original_firstorder_Entropy	original_firstorder_InterquartileRange	original_firstorder_Maximum	original_firstorder_MeanAbsoluteDeviation	original_firstorder_Mean	original_firstorder_Median	original_firstorder_Minimum	original_firstorder_Range	original_firstorder_RobustMeanAbsoluteDeviation	original_firstorder_RootMeanSquared	original_firstorder_TotalEnergy	original_firstorder_Uniformity	original_firstorder_Variance	original_glcm_Autocorrelation	original_glcm_ClusterProminence	original_glcm_ClusterTendency	original_glcm_Contrast	original_glcm_Correlation	original_glcm_DifferenceAverage	original_glcm_DifferenceEntropy	original_glcm_DifferenceVariance	original_glcm_Id	original_glcm_Idm	original_glcm_Idmn	original_glcm_Idn	original_glcm_Imc1	original_glcm_Imc2	original_glcm_InverseVariance	original_glcm_JointAverage	original_glcm_JointEnergy	original_glcm_JointEntropy	original_glcm_MCC	original_glcm_MaximumProbability	original_glcm_SumAverage	original_glcm_SumEntropy
original_shape_Flatness	1	0.710472	0.133384	0.199923	0.341213	0.222891	0.544589	0.459678	0.48769	0.548966	0.544589	0.0410329	0.0294343	0.302987	0.0274647	0.00951964	0.0366561	0.0202429	0.0661998	0.0219937	0.211949	0.264471	0.00667469	0.237335	0.302987	0.0219937	0.022869	0.243681	0.140387	0.0675129	0.154393	0.411971	0.13426	0.143889	0.136448	0.137542	0.134041	0.284386	0.171901	0.355947	0.400591	0.0244009	0.241274	0.0594157	0.0419083	0.403655	0.0705766	0.241274	0.0751723
original_shape_LeastAxisLength	0.710472	1	0.710909	0.735132	0.763515	0.743079	0.951198	0.814641	0.906992	0.915965	0.951198	0.0815188	0.166211	0.764526	0.277164	0.24762	0.26841	0.297516	0.0675129	0.122223	0.42904	0.549404	0.251778	0.00667469	0.764526	0.264909	0.307364	0.557939	0.445891	0.368421	0.0460663	0.466462	0.0281212	0.0493489	0.0515374	0.0112704	0.0141153	0.516358	0.397527	0.380239	0.430135	0.11916	0.543057	0.167743	0.197724	0.508699	0.198381	0.543057	0.33844
original_shape_MajorAxisLength	0.133384	0.710909	1	0.93976	0.821405	0.958201	0.828428	0.791443	0.870445	0.719444	0.828428	0.222672	0.130539	0.856439	0.297297	0.286355	0.262064	0.346318	0.0108327	0.0357807	0.63147	0.61243	0.290076	0.178466	0.856439	0.286355	0.382646	0.638472	0.515921	0.426633	0.155706	0.248495	0.13229	0.146515	0.152643	0.121348	0.119597	0.615932	0.565817	0.123099	0.167524	0.204289	0.62753	0.226611	0.254842	0.339972	0.280884	0.62753	0.335814
original_shape_Maximum2DDiameterColumn	0.199923	0.735132	0.93976	1	0.811601	0.963506	0.843027	0.822345	0.878591	0.755594	0.843027	0.209991	0.0657657	0.837884	0.217103	0.193358	0.25792	0.251464	0.0415823	0.00175083	0.577885	0.589922	0.197844	0.111725	0.837884	0.206051	0.290748	0.572523	0.4318	0.331455	0.0760519	0.260765	0.057121	0.0629206	0.0669694	0.0471631	0.0454123	0.696942	0.631504	0.15287	0.194561	0.161624	0.562893	0.140286	0.163156	0.363955	0.207802	0.562893	0.256826
original_shape_Maximum2DDiameterSlice	0.341213	0.763515	0.821405	0.811601	1	0.865835	0.866492	0.896914	0.900635	0.742066	0.866492	0.116109	0.153206	0.683082	0.3109	0.276756	0.345262	0.343073	0.0339243	0.10035	0.526045	0.706063	0.279821	0.0329394	0.683082	0.289451	0.405559	0.717553	0.553185	0.439702	0.197308	0.337382	0.176297	0.199278	0.205844	0.170278	0.175312	0.681768	0.546947	0.171263	0.257715	0.0811994	0.712629	0.241738	0.269315	0.43237	0.288685	0.712629	0.335741
original_shape_Maximum3DDiameter	0.222891	0.743079	0.958201	0.963506	0.865835	1	0.856002	0.843309	0.898895	0.745268	0.856002	0.20604	0.0990262	0.86388	0.252872	0.21742	0.274538	0.292483	0.0272459	0.0287778	0.643725	0.636284	0.223985	0.133166	0.86388	0.235146	0.347412	0.641974	0.494693	0.390743	0.100996	0.290513	0.0775796	0.0946493	0.103184	0.0740781	0.0723274	0.707627	0.631032	0.150016	0.203195	0.172557	0.633001	0.170369	0.199694	0.390524	0.229018	0.633001	0.287231
original_shape_MeshVolume	0.544589	0.951198	0.828428	0.843027	0.866492	0.856002	1	0.91312	0.958858	0.944414	1	0.131853	0.144983	0.813546	0.300142	0.273881	0.278915	0.322683	0.029872	0.0834883	0.526425	0.628625	0.27782	0.0154284	0.813546	0.288981	0.343692	0.660138	0.49141	0.40256	0.105373	0.425539	0.0819565	0.0985885	0.104716	0.0664186	0.0697013	0.639786	0.517015	0.316993	0.373892	0.104278	0.647883	0.205602	0.233395	0.503447	0.252216	0.647883	0.356166
original_shape_MinorAxisLength	0.459678	0.814641	0.791443	0.822345	0.896914	0.843309	0.91312	1	0.936317	0.796039	0.91312	0.178247	0.0786738	0.673487	0.308021	0.269942	0.262064	0.322683	0.0469417	0.0093008	0.562315	0.695809	0.270161	0.115439	0.673487	0.299267	0.37236	0.721414	0.522486	0.416785	0.158551	0.38374	0.150454	0.147171	0.153956	0.141044	0.145421	0.737389	0.600394	0.213918	0.301236	0.0390634	0.715505	0.239961	0.256811	0.488128	0.284167	0.715505	0.34785
original_shape_SurfaceArea	0.48769	0.906992	0.870445	0.878591	0.900635	0.898895	0.958858	0.936317	1	0.827333	0.958858	0.174964	0.133603	0.796695	0.34216	0.297078	0.323777	0.366451	0.00667469	0.0460663	0.584637	0.710253	0.301018	0.010395	0.796695	0.326184	0.405405	0.713535	0.553781	0.448299	0.180654	0.355728	0.163585	0.179998	0.187657	0.150016	0.15308	0.680928	0.545683	0.195973	0.280884	0.0633549	0.702812	0.262501	0.292045	0.430791	0.30255	0.702812	0.384178
original_shape_SurfaceVolumeRatio	0.548966	0.915965	0.719444	0.755594	0.742066	0.745268	0.944414	0.796039	0.827333	1	0.944414	0.0806434	0.160302	0.782252	0.239961	0.228581	0.223766	0.253529	0.0764854	0.127257	0.424664	0.495787	0.231645	0.0204618	0.782252	0.23055	0.256155	0.530583	0.39315	0.328154	0.00973848	0.475216	0.0165226	0.00273553	0.00164132	0.0324981	0.031185	0.544589	0.446548	0.428603	0.456177	0.106686	0.514389	0.127913	0.149579	0.544589	0.179998	0.514389	0.307802
original_shape_VoxelVolume	0.544589	0.951198	0.828428	0.843027	0.866492	0.856002	1	0.91312	0.958858	0.944414	1	0.131853	0.144983	0.813546	0.300142	0.273881	0.278915	0.322683	0.029872	0.0834883	0.526425	0.628625	0.27782	0.0154284	0.813546	0.288981	0.343692	0.660138	0.49141	0.40256	0.105373	0.425539	0.0819565	0.0985885	0.104716	0.0664186	0.0697013	0.639786	0.517015	0.316993	0.373892	0.104278	0.647883	0.205602	0.233395	0.503447	0.252216	0.647883	0.356166
original_firstorder_10Percentile	0.0410329	0.0815188	0.222672	0.209991	0.116109	0.20604	0.131853	0.178247	0.174964	0.0806434	0.131853	1	0.635409	0.022869	0.190283	0.188533	0.198599	0.180873	0.865631	0.833899	0.514389	0.267316	0.189189	0.6295	0.022869	0.176059	0.152424	0.129445	0.135792	0.133384	0.215888	0.170369	0.229894	0.193347	0.168618	0.224642	0.21742	0.0937739	0.00711238	0.276507	0.211511	0.0530693	0.134479	0.193785	0.19466	0.147171	0.159427	0.134479	0.173651
original_firstorder_90Percentile	0.0294343	0.166211	0.130539	0.0657657	0.153206	0.0990262	0.144983	0.0786738	0.133603	0.160302	0.144983	0.635409	1	0.335814	0.589233	0.577853	0.742423	0.586607	0.917059	0.907211	0.0841449	0.310647	0.57851	0.803698	0.335814	0.593829	0.597987	0.286574	0.534085	0.593172	0.454864	0.130102	0.42532	0.469526	0.492505	0.424007	0.426852	0.140606	0.195098	0.0585403	0.162928	0.20801	0.265565	0.559689	0.559689	0.0845826	0.565379	0.265565	0.589671
original_firstorder_Energy	0.302987	0.764526	0.856439	0.837884	0.683082	0.86388	0.813546	0.673487	0.796695	0.782252	0.813546	0.022869	0.335814	1	0.263377	0.217858	0.336908	0.285261	0.227487	0.273225	0.568662	0.516577	0.222016	0.438888	1	0.243681	0.325966	0.546121	0.47062	0.385053	0.0694824	0.286574	0.0421271	0.0616041	0.0802057	0.0397199	0.0359996	0.515264	0.475654	0.204727	0.239304	0.147171	0.527301	0.165554	0.196192	0.34785	0.238648	0.527301	0.314367
original_firstorder_Entropy	0.0274647	0.277164	0.297297	0.217103	0.3109	0.252872	0.300142	0.308021	0.34216	0.239961	0.300142	0.190283	0.589233	0.263377	1	0.974177	0.781158	0.981617	0.260532	0.271036	0.319838	0.690995	0.97549	0.230769	0.263377	0.989933	0.967611	0.498195	0.849436	0.931721	0.850312	0.0320604	0.824488	0.848999	0.860816	0.815516	0.815735	0.035343	0.223985	0.18525	0.0309662	0.422256	0.479374	0.958639	0.967611	0.017398	0.92822	0.479374	0.977459
original_firstorder_InterquartileRange	0.00951964	0.24762	0.286355	0.193358	0.276756	0.21742	0.273881	0.269942	0.297078	0.228581	0.273881	0.188533	0.577853	0.217858	0.974177	1	0.751614	0.969143	0.262064	0.265565	0.230113	0.605646	0.998249	0.229894	0.217858	0.989277	0.932378	0.401904	0.78444	0.910931	0.819017	0.043659	0.79013	0.813546	0.821425	0.780501	0.78072	0.102746	0.262501	0.147171	0.0508808	0.373673	0.381114	0.949229	0.948572	0.0171791	0.918591	0.381114	0.966298
original_firstorder_Maximum	0.0366561	0.26841	0.262064	0.25792	0.345262	0.274538	0.278915	0.262064	0.323777	0.223766	0.278915	0.198599	0.742423	0.336908	0.781158	0.751614	1	0.758617	0.536273	0.513732	0.0889594	0.650728	0.754678	0.459241	0.336908	0.787066	0.783127	0.34019	0.674144	0.719006	0.731699	0.0773608	0.705876	0.737608	0.761024	0.703687	0.705001	0.0169603	0.171025	0.20407	0.05482	0.397308	0.323558	0.773279	0.783784	0.100558	0.812233	0.323558	0.754459
original_firstorder_MeanAbsoluteDeviation	0.0202429	0.297516	0.346318	0.251464	0.343073	0.292483	0.322683	0.322683	0.366451	0.253529	0.322683	0.180873	0.586607	0.285261	0.981617	0.969143	0.758617	1	0.272787	0.292702	0.329029	0.692308	0.975927	0.241493	0.285261	0.972864	0.984681	0.513514	0.891235	0.961921	0.810045	0.106686	0.772842	0.814203	0.832367	0.758398	0.758617	0.00667469	0.153299	0.109312	0.0964	0.330561	0.492505	0.917715	0.93763	0.0605099	0.885764	0.492505	0.965642
original_firstorder_Mean	0.0661998	0.0675129	0.0108327	0.0415823	0.0339243	0.0272459	0.029872	0.0469417	0.00667469	0.0764854	0.029872	0.865631	0.917059	0.227487	0.260532	0.262064	0.536273	0.272787	1	0.980523	0.314148	0.0333735	0.26272	0.821862	0.227487	0.273225	0.284167	0.086771	0.256155	0.299267	0.157676	0.183062	0.127694	0.175621	0.197724	0.128132	0.132509	0.14367	0.116971	0.202757	0.232958	0.0661998	0.0694824	0.237553	0.235584	0.148922	0.261407	0.0694824	0.276726
original_firstorder_Median	0.0219937	0.122223	0.0357807	0.00175083	0.10035	0.0287778	0.0834883	0.0093008	0.0460663	0.127257	0.0834883	0.833899	0.907211	0.273225	0.271036	0.265565	0.513732	0.292702	0.980523	1	0.250684	0.0637925	0.266659	0.814641	0.273225	0.273006	0.310866	0.150016	0.300799	0.333625	0.142138	0.244775	0.10406	0.161615	0.182843	0.100558	0.104935	0.0843637	0.0596345	0.250027	0.285699	0.0379691	0.129883	0.222672	0.229237	0.214794	0.235365	0.129883	0.285917
original_firstorder_Minimum	0.211949	0.42904	0.63147	0.577885	0.526045	0.643725	0.526425	0.562315	0.584637	0.424664	0.526425	0.514389	0.0841449	0.568662	0.319838	0.230113	0.0889594	0.329029	0.314148	0.250684	1	0.708502	0.234927	0.0467228	0.568662	0.264033	0.390524	0.778313	0.510887	0.349819	0.271474	0.0165226	0.266441	0.266441	0.279571	0.266659	0.261188	0.528395	0.416566	0.176715	0.0900536	0.0265893	0.78444	0.253967	0.284167	0.0942116	0.27038	0.78444	0.281978
original_firstorder_Range	0.264471	0.549404	0.61243	0.589922	0.706063	0.636284	0.628625	0.695809	0.710253	0.495787	0.628625	0.267316	0.310647	0.516577	0.690995	0.605646	0.650728	0.692308	0.0333735	0.0637925	0.708502	1	0.61243	0.0239632	0.516577	0.651822	0.75052	0.855345	0.803917	0.680709	0.635409	0.0296531	0.614838	0.639786	0.663202	0.605646	0.60674	0.51789	0.285261	0.186782	0.0250574	0.227049	0.84878	0.638254	0.667579	0.121348	0.672174	0.84878	0.642849
original_firstorder_RobustMeanAbsoluteDeviation	0.00667469	0.251778	0.290076	0.197844	0.279821	0.223985	0.27782	0.270161	0.301018	0.231645	0.27782	0.189189	0.57851	0.222016	0.97549	0.998249	0.754678	0.975927	0.26272	0.266659	0.234927	0.61243	1	0.227924	0.222016	0.989496	0.940037	0.407156	0.795382	0.919685	0.818142	0.0532881	0.786629	0.814422	0.823613	0.775687	0.775905	0.0933363	0.253967	0.138199	0.0598534	0.360324	0.386366	0.945946	0.948791	0.0093008	0.912463	0.386366	0.968706
original_firstorder_RootMeanSquared	0.237335	0.00667469	0.178466	0.111725	0.0329394	0.133166	0.0154284	0.115439	0.010395	0.0204618	0.0154284	0.6295	0.803698	0.438888	0.230769	0.229894	0.459241	0.241493	0.821862	0.814641	0.0467228	0.0239632	0.227924	1	0.438888	0.240617	0.261188	0.0440967	0.219608	0.269067	0.134697	0.00142248	0.105154	0.143451	0.162928	0.114783	0.110187	0.148047	0.0707955	0.0254951	0.0303097	0.029872	0.0244009	0.212168	0.207572	0.0279024	0.248933	0.0244009	0.237116
original_firstorder_TotalEnergy	0.302987	0.764526	0.856439	0.837884	0.683082	0.86388	0.813546	0.673487	0.796695	0.782252	0.813546	0.022869	0.335814	1	0.263377	0.217858	0.336908	0.285261	0.227487	0.273225	0.568662	0.516577	0.222016	0.438888	1	0.243681	0.325966	0.546121	0.47062	0.385053	0.0694824	0.286574	0.0421271	0.0616041	0.0802057	0.0397199	0.0359996	0.515264	0.475654	0.204727	0.239304	0.147171	0.527301	0.165554	0.196192	0.34785	0.238648	0.527301	0.314367
original_firstorder_Uniformity	0.0219937	0.264909	0.286355	0.206051	0.289451	0.235146	0.288981	0.299267	0.326184	0.23055	0.288981	0.176059	0.593829	0.243681	0.989933	0.989277	0.787066	0.972864	0.273225	0.273006	0.264033	0.651822	0.989496	0.240617	0.243681	1	0.946384	0.438888	0.803917	0.915965	0.845935	0.0202429	0.820987	0.840683	0.850312	0.813109	0.813327	0.0729839	0.253529	0.185469	0.0254951	0.418755	0.419411	0.96783	0.968487	0.038188	0.941569	0.419411	0.976584
original_firstorder_Variance	0.022869	0.307364	0.382646	0.290748	0.405559	0.347412	0.343692	0.37236	0.405405	0.256155	0.343692	0.152424	0.597987	0.325966	0.967611	0.932378	0.783127	0.984681	0.284167	0.310866	0.390524	0.75052	0.940037	0.261188	0.325966	0.946384	1	0.581792	0.928876	0.96214	0.819017	0.0828318	0.783784	0.826677	0.847905	0.77131	0.771747	0.0760477	0.0968377	0.147828	0.0570084	0.33275	0.563847	0.899551	0.926031	0.0550388	0.87898	0.563847	0.938943
original_glcm_Autocorrelation	0.243681	0.557939	0.638472	0.572523	0.717553	0.641974	0.660138	0.721414	0.713535	0.530583	0.660138	0.129445	0.286574	0.546121	0.498195	0.401904	0.34019	0.513514	0.086771	0.150016	0.778313	0.855345	0.407156	0.0440967	0.546121	0.438888	0.581792	1	0.708283	0.536492	0.434511	0.146296	0.413284	0.441077	0.459678	0.399497	0.403874	0.590984	0.421162	0.0537258	0.0712332	0.0751723	0.998249	0.429478	0.465368	0.265127	0.441296	0.998249	0.45377
original_glcm_ClusterProminence	0.140387	0.445891	0.515921	0.4318	0.553185	0.494693	0.49141	0.522486	0.553781	0.39315	0.49141	0.135792	0.534085	0.47062	0.849436	0.78444	0.674144	0.891235	0.256155	0.300799	0.510887	0.803917	0.795382	0.219608	0.47062	0.803917	0.928876	0.708283	1	0.938505	0.646351	0.280884	0.611336	0.65598	0.693402	0.597768	0.598424	0.303206	0.158114	0.0259328	0.231426	0.240179	0.688587	0.728636	0.768684	0.294452	0.713754	0.688587	0.847029
original_glcm_ClusterTendency	0.0675129	0.368421	0.426633	0.331455	0.439702	0.390743	0.40256	0.416785	0.448299	0.328154	0.40256	0.133384	0.593172	0.385053	0.931721	0.910931	0.719006	0.961921	0.299267	0.333625	0.349819	0.680709	0.919685	0.269067	0.385053	0.915965	0.96214	0.536492	0.938505	1	0.700186	0.272349	0.662326	0.70325	0.729292	0.653791	0.65401	0.128132	0.00995733	0.0335923	0.241493	0.261626	0.511325	0.836962	0.859284	0.229237	0.803042	0.511325	0.9547
original_glcm_Contrast	0.154393	0.0460663	0.155706	0.0760519	0.197308	0.100996	0.105373	0.158551	0.180654	0.00973848	0.105373	0.215888	0.454864	0.0694824	0.850312	0.819017	0.731699	0.810045	0.157676	0.142138	0.271474	0.635409	0.818142	0.134697	0.0694824	0.845935	0.819017	0.434511	0.646351	0.700186	1	0.439545	0.992559	0.996717	0.990371	0.986651	0.986869	0.224204	0.44239	0.619214	0.443484	0.545464	0.431448	0.93391	0.940475	0.454426	0.929533	0.431448	0.766933
original_glcm_Correlation	0.411971	0.466462	0.248495	0.260765	0.337382	0.290513	0.425539	0.38374	0.355728	0.475216	0.425539	0.170369	0.130102	0.286574	0.0320604	0.043659	0.0773608	0.106686	0.183062	0.244775	0.0165226	0.0296531	0.0532881	0.00142248	0.286574	0.0202429	0.0828318	0.146296	0.280884	0.272349	0.439545	1	0.471496	0.430572	0.400153	0.481344	0.477186	0.482	0.555969	0.938505	0.982055	0.248495	0.12091	0.187001	0.171244	0.967611	0.227049	0.12091	0.165773
original_glcm_DifferenceAverage	0.13426	0.0281212	0.13229	0.057121	0.176297	0.0775796	0.0819565	0.150454	0.163585	0.0165226	0.0819565	0.229894	0.42532	0.0421271	0.824488	0.79013	0.705876	0.772842	0.127694	0.10406	0.266441	0.614838	0.786629	0.105154	0.0421271	0.820987	0.783784	0.413284	0.611336	0.662326	0.992559	0.471496	1	0.987088	0.976803	0.997155	0.997374	0.251997	0.473028	0.655542	0.475654	0.573695	0.41394	0.922311	0.923843	0.486377	0.916621	0.41394	0.740891
original_glcm_DifferenceEntropy	0.143889	0.0493489	0.146515	0.0629206	0.199278	0.0946493	0.0985885	0.147171	0.179998	0.00273553	0.0985885	0.193347	0.469526	0.0616041	0.848999	0.813546	0.737608	0.814203	0.175621	0.161615	0.266441	0.639786	0.814422	0.143451	0.0616041	0.840683	0.826677	0.441077	0.65598	0.70325	0.996717	0.430572	0.987088	1	0.994091	0.980523	0.980961	0.2288	0.446985	0.611555	0.437356	0.532334	0.438669	0.92822	0.938505	0.449174	0.918809	0.438669	0.760586
original_glcm_DifferenceVariance	0.136448	0.0515374	0.152643	0.0669694	0.205844	0.103184	0.104716	0.153956	0.187657	0.00164132	0.104716	0.168618	0.492505	0.0802057	0.860816	0.821425	0.761024	0.832367	0.197724	0.182843	0.279571	0.663202	0.823613	0.162928	0.0802057	0.850312	0.847905	0.459678	0.693402	0.729292	0.990371	0.400153	0.976803	0.994091	1	0.970237	0.970675	0.190721	0.404092	0.587482	0.407594	0.534522	0.456177	0.925812	0.942226	0.417223	0.919028	0.456177	0.775687
original_glcm_Id	0.137542	0.0112704	0.121348	0.0471631	0.170278	0.0740781	0.0664186	0.141044	0.150016	0.0324981	0.0664186	0.224642	0.424007	0.0397199	0.815516	0.780501	0.703687	0.758398	0.128132	0.100558	0.266659	0.605646	0.775687	0.114783	0.0397199	0.813109	0.77131	0.399497	0.597768	0.653791	0.986651	0.481344	0.997155	0.980523	0.970237	1	0.999781	0.258343	0.478061	0.668235	0.487471	0.586607	0.401029	0.920123	0.917715	0.495787	0.916402	0.401029	0.732794
original_glcm_Idm	0.134041	0.0141153	0.119597	0.0454123	0.175312	0.0723274	0.0697013	0.145421	0.15308	0.031185	0.0697013	0.21742	0.426852	0.0359996	0.815735	0.78072	0.705001	0.758617	0.132509	0.104935	0.261188	0.60674	0.775905	0.110187	0.0359996	0.813327	0.771747	0.403874	0.598424	0.65401	0.986869	0.477186	0.997374	0.980961	0.970675	0.999781	1	0.254623	0.476091	0.664734	0.483532	0.586169	0.405624	0.920341	0.917934	0.491629	0.915965	0.405624	0.733012
original_glcm_Idmn	0.284386	0.516358	0.615932	0.696942	0.681768	0.707627	0.639786	0.737389	0.680928	0.544589	0.639786	0.0937739	0.140606	0.515264	0.035343	0.102746	0.0169603	0.00667469	0.14367	0.0843637	0.528395	0.51789	0.0933363	0.148047	0.515264	0.0729839	0.0760477	0.590984	0.303206	0.128132	0.224204	0.482	0.251997	0.2288	0.190721	0.258343	0.254623	1	0.944633	0.377394	0.405624	0.184812	0.585513	0.173651	0.142357	0.608491	0.123318	0.585513	0.000765948
original_glcm_Idn	0.171901	0.397527	0.565817	0.631504	0.546947	0.631032	0.517015	0.600394	0.545683	0.446548	0.517015	0.00711238	0.195098	0.475654	0.223985	0.262501	0.171025	0.153299	0.116971	0.0596345	0.416566	0.285261	0.253967	0.0707955	0.475654	0.253529	0.0968377	0.421162	0.158114	0.00995733	0.44239	0.555969	0.473028	0.446985	0.404092	0.478061	0.476091	0.944633	1	0.504322	0.483094	0.35726	0.414159	0.374767	0.343911	0.677426	0.319619	0.414159	0.167524
original_glcm_Imc1	0.355947	0.380239	0.123099	0.15287	0.171263	0.150016	0.316993	0.213918	0.195973	0.428603	0.316993	0.276507	0.0585403	0.204727	0.18525	0.147171	0.20407	0.109312	0.202757	0.250027	0.176715	0.186782	0.138199	0.0254951	0.204727	0.185469	0.147828	0.0537258	0.0259328	0.0335923	0.619214	0.938505	0.655542	0.611555	0.587482	0.668235	0.664734	0.377394	0.504322	1	0.955794	0.387023	0.0771419	0.391837	0.379582	0.910056	0.41219	0.0771419	0.0480359
original_glcm_Imc2	0.400591	0.430135	0.167524	0.194561	0.257715	0.203195	0.373892	0.301236	0.280884	0.456177	0.373892	0.211511	0.162928	0.239304	0.0309662	0.0508808	0.05482	0.0964	0.232958	0.285699	0.0900536	0.0250574	0.0598534	0.0303097	0.239304	0.0254951	0.0570084	0.0712332	0.231426	0.241493	0.443484	0.982055	0.475654	0.437356	0.407594	0.487471	0.483532	0.405624	0.483094	0.955794	1	0.220265	0.0454098	0.185031	0.172995	0.937849	0.223766	0.0454098	0.169931
original_glcm_InverseVariance	0.0244009	0.11916	0.204289	0.161624	0.0811994	0.172557	0.104278	0.0390634	0.0633549	0.106686	0.104278	0.0530693	0.20801	0.147171	0.422256	0.373673	0.397308	0.330561	0.0661998	0.0379691	0.0265893	0.227049	0.360324	0.029872	0.147171	0.418755	0.33275	0.0751723	0.240179	0.261626	0.545464	0.248495	0.573695	0.532334	0.534522	0.586607	0.586169	0.184812	0.35726	0.387023	0.220265	1	0.07561	0.485721	0.476748	0.311303	0.472152	0.07561	0.374767
original_glcm_JointAverage	0.241274	0.543057	0.62753	0.562893	0.712629	0.633001	0.647883	0.715505	0.702812	0.514389	0.647883	0.134479	0.265565	0.527301	0.479374	0.381114	0.323558	0.492505	0.0694824	0.129883	0.78444	0.84878	0.386366	0.0244009	0.527301	0.419411	0.563847	0.998249	0.688587	0.511325	0.431448	0.12091	0.41394	0.438669	0.456177	0.401029	0.405624	0.585513	0.414159	0.0771419	0.0454098	0.07561	1	0.416566	0.452675	0.242149	0.428384	1	0.430135
original_glcm_JointEnergy	0.0594157	0.167743	0.226611	0.140286	0.241738	0.170369	0.205602	0.239961	0.262501	0.127913	0.205602	0.193785	0.559689	0.165554	0.958639	0.949229	0.773279	0.917715	0.237553	0.222672	0.253967	0.638254	0.945946	0.212168	0.165554	0.96783	0.899551	0.429478	0.728636	0.836962	0.93391	0.187001	0.922311	0.92822	0.925812	0.920123	0.920341	0.173651	0.374767	0.391837	0.185031	0.485721	0.416566	1	0.992341	0.231426	0.976365	0.416566	0.919028
original_glcm_JointEntropy	0.0419083	0.197724	0.254842	0.163156	0.269315	0.199694	0.233395	0.256811	0.292045	0.149579	0.233395	0.19466	0.559689	0.196192	0.967611	0.948572	0.783784	0.93763	0.235584	0.229237	0.284167	0.667579	0.948791	0.207572	0.196192	0.968487	0.926031	0.465368	0.768684	0.859284	0.940475	0.171244	0.923843	0.938505	0.942226	0.917715	0.917934	0.142357	0.343911	0.379582	0.172995	0.476748	0.452675	0.992341	1	0.216763	0.969143	0.452675	0.925594
original_glcm_MCC	0.403655	0.508699	0.339972	0.363955	0.43237	0.390524	0.503447	0.488128	0.430791	0.544589	0.503447	0.147171	0.0845826	0.34785	0.017398	0.0171791	0.100558	0.0605099	0.148922	0.214794	0.0942116	0.121348	0.0093008	0.0279024	0.34785	0.038188	0.0550388	0.265127	0.294452	0.229237	0.454426	0.967611	0.486377	0.449174	0.417223	0.495787	0.491629	0.608491	0.677426	0.910056	0.937849	0.311303	0.242149	0.231426	0.216763	1	0.246964	0.242149	0.100339
original_glcm_MaximumProbability	0.0705766	0.198381	0.280884	0.207802	0.288685	0.229018	0.252216	0.284167	0.30255	0.179998	0.252216	0.159427	0.565379	0.238648	0.92822	0.918591	0.812233	0.885764	0.261407	0.235365	0.27038	0.672174	0.912463	0.248933	0.238648	0.941569	0.87898	0.441296	0.713754	0.803042	0.929533	0.227049	0.916621	0.918809	0.919028	0.916402	0.915965	0.123318	0.319619	0.41219	0.223766	0.472152	0.428384	0.976365	0.969143	0.246964	1	0.428384	0.884014
original_glcm_SumAverage	0.241274	0.543057	0.62753	0.562893	0.712629	0.633001	0.647883	0.715505	0.702812	0.514389	0.647883	0.134479	0.265565	0.527301	0.479374	0.381114	0.323558	0.492505	0.0694824	0.129883	0.78444	0.84878	0.386366	0.0244009	0.527301	0.419411	0.563847	0.998249	0.688587	0.511325	0.431448	0.12091	0.41394	0.438669	0.456177	0.401029	0.405624	0.585513	0.414159	0.0771419	0.0454098	0.07561	1	0.416566	0.452675	0.242149	0.428384	1	0.430135
original_glcm_SumEntropy	0.0751723	0.33844	0.335814	0.256826	0.335741	0.287231	0.356166	0.34785	0.384178	0.307802	0.356166	0.173651	0.589671	0.314367	0.977459	0.966298	0.754459	0.965642	0.276726	0.285917	0.281978	0.642849	0.968706	0.237116	0.314367	0.976584	0.938943	0.45377	0.847029	0.9547	0.766933	0.165773	0.740891	0.760586	0.775687	0.732794	0.733012	0.000765948	0.167524	0.0480359	0.169931	0.374767	0.430135	0.919028	0.925594	0.100339	0.884014	0.430135	1
original_glcm_SumSquares	0.002079	0.273225	0.339534	0.23877	0.355001	0.291607	0.311084	0.342817	0.369953	0.227705	0.311084	0.170588	0.58792	0.288981	0.980304	0.956669	0.756647	0.985338	0.271693	0.289419	0.334063	0.692964	0.96039	0.248714	0.288981	0.970019	0.982711	0.520516	0.896488	0.966298	0.832804	0.0745158	0.800635	0.834993	0.852938	0.792537	0.792756	0.00995733	0.155706	0.163366	0.0510997	0.373892	0.499508	0.934566	0.949229	0.0316227	0.907649	0.499508	0.964985
original_gldm_DependenceEntropy	0.467557	0.692745	0.484845	0.469442	0.515211	0.483532	0.65226	0.540869	0.57282	0.705438	0.65226	0.0510997	0.41591	0.542182	0.472371	0.47828	0.380239	0.51986	0.304081	0.342817	0.229894	0.429478	0.488347	0.173433	0.542182	0.466244	0.492723	0.396871	0.605646	0.628187	0.0338111	0.783565	0.000328263	0.0329358	0.0596345	0.014553	0.0130211	0.401904	0.353977	0.69187	0.794507	0.111719	0.368202	0.279133	0.299048	0.757304	0.271036	0.368202	0.59361
original_gldm_DependenceNonUniformity	0.494693	0.906773	0.852719	0.834163	0.867695	0.852719	0.959952	0.91684	0.964548	0.867819	0.959952	0.218295	0.208885	0.798665	0.469526	0.437138	0.412846	0.477842	0.0171791	0.0655433	0.595142	0.758398	0.437575	0.0149907	0.798665	0.460991	0.501258	0.727322	0.61243	0.535179	0.311741	0.298392	0.295109	0.301236	0.306926	0.281759	0.283729	0.576759	0.418317	0.140387	0.237553	0.018711	0.713098	0.402779	0.42532	0.372141	0.446548	0.713098	0.505854
original_gldm_DependenceNonUniformityNormalized	0.208447	0.146953	0.00426743	0.0817421	0.0107244	0.05482	0.101215	0.0211183	0.00120363	0.195973	0.101215	0.265346	0.329467	0.0530693	0.714848	0.685524	0.600175	0.642193	0.0445344	0.0138965	0.201007	0.460116	0.677426	0.11719	0.0530693	0.719006	0.649633	0.237116	0.44983	0.532553	0.929533	0.59361	0.94704	0.919028	0.907211	0.956669	0.954262	0.366014	0.558595	0.763213	0.594923	0.62009	0.236897	0.848999	0.837181	0.629719	0.838276	0.236897	0.629938
original_gldm_DependenceVariance	0.188752	0.148703	0.0184922	0.0877606	0.0190414	0.0607287	0.0957435	0.00142248	0.000109421	0.189189	0.0957435	0.258781	0.314148	0.0749535	0.69756	0.667797	0.598424	0.622278	0.0364372	0.00186016	0.188533	0.464274	0.660138	0.079768	0.0749535	0.703906	0.631251	0.239742	0.432542	0.515045	0.929314	0.597768	0.950542	0.917059	0.904147	0.961265	0.959514	0.353759	0.555094	0.766058	0.601926	0.633439	0.241711	0.83937	0.826458	0.626874	0.832586	0.241711	0.614838
original_gldm_GrayLevelNonUniformity	0.521173	0.898019	0.784878	0.827269	0.796892	0.827552	0.944414	0.840683	0.891235	0.910493	0.944414	0.0572273	0.0112704	0.7921	0.0156472	0.0119269	0.061823	0.0475982	0.0254951	0.0305285	0.468651	0.440858	0.00579932	0.0359996	0.7921	0.00426743	0.0767042	0.535835	0.254185	0.139512	0.156363	0.429259	0.179998	0.160302	0.154174	0.195317	0.192253	0.697998	0.633877	0.390962	0.380676	0.259656	0.529708	0.0837072	0.0508808	0.51789	0.0248386	0.529708	0.0749535
original_gldm_GrayLevelVariance	0.0338111	0.307145	0.373454	0.274334	0.391989	0.334063	0.341503	0.369515	0.401247	0.254185	0.341503	0.154393	0.597768	0.32137	0.970019	0.936317	0.762337	0.986651	0.282416	0.310647	0.391181	0.734107	0.943539	0.259656	0.32137	0.950323	0.997812	0.579385	0.929095	0.96783	0.81289	0.0981508	0.77875	0.819455	0.841339	0.766495	0.766933	0.0646679	0.10406	0.137105	0.0718897	0.339753	0.561002	0.901083	0.92625	0.0644491	0.873947	0.561002	0.945289
original_gldm_HighGrayLevelEmphasis	0.236678	0.544589	0.624685	0.562565	0.707923	0.636284	0.64832	0.713973	0.705001	0.516577	0.64832	0.142138	0.290732	0.534304	0.517453	0.418098	0.36492	0.525112	0.0806434	0.138199	0.778969	0.871758	0.422913	0.0401576	0.534304	0.458584	0.59361	0.996717	0.70894	0.541525	0.465587	0.111719	0.44611	0.472371	0.490097	0.43473	0.438669	0.573257	0.390962	0.0933363	0.0366561	0.104716	0.995842	0.458146	0.491848	0.23055	0.469745	0.995842	0.467557
original_gldm_LargeDependenceEmphasis	0.224204	0.189189	0.0747347	0.14324	0.0115999	0.113032	0.150235	0.0331546	0.0445344	0.253091	0.150235	0.207791	0.369515	0.151111	0.74111	0.707845	0.628843	0.674581	0.0979319	0.0642302	0.163585	0.478936	0.700624	0.0953058	0.151111	0.743736	0.682679	0.264252	0.479155	0.553781	0.942663	0.55772	0.957763	0.936973	0.928876	0.965204	0.964329	0.367765	0.56516	0.728198	0.555312	0.615056	0.266878	0.864755	0.853376	0.588139	0.845278	0.266878	0.646351
original_gldm_LargeDependenceHighGrayLevelEmphasis	0.364263	0.59361	0.612868	0.606226	0.72773	0.660138	0.696903	0.764526	0.700624	0.610023	0.696903	0.0149907	0.0585403	0.517453	0.0872087	0.0276836	0.029872	0.148485	0.0335923	0.123755	0.58223	0.51986	0.0390634	0.0762665	0.517453	0.0427837	0.210636	0.783784	0.43101	0.263158	0.0966189	0.532553	0.124412	0.0913667	0.0675129	0.138418	0.131196	0.826239	0.772623	0.393588	0.445454	0.191815	0.783784	0.0482547	0.00908196	0.64088	0.0373126	0.783784	0.111719
original_gldm_SmallDependenceEmphasis	0.262064	0.281978	0.173214	0.241287	0.0415846	0.197286	0.250465	0.130102	0.121567	0.385928	0.250465	0.113251	0.316993	0.272787	0.61243	0.565379	0.548091	0.555969	0.0913667	0.0644491	0.0979319	0.418317	0.564285	0.0333735	0.272787	0.601707	0.572163	0.251778	0.375424	0.416566	0.847248	0.577634	0.857096	0.860379	0.858409	0.861692	0.86388	0.346099	0.529489	0.733231	0.577415	0.547653	0.264033	0.734544	0.739578	0.62009	0.694058	0.264033	0.490973
original_gldm_SmallDependenceHighGrayLevelEmphasis	0.00864427	0.139293	0.23624	0.170597	0.333662	0.22683	0.212824	0.315899	0.31765	0.071452	0.212824	0.246526	0.327498	0.150673	0.728198	0.630375	0.563191	0.681366	0.0333735	0.0427837	0.544151	0.779407	0.630375	0.00514279	0.150673	0.682679	0.729511	0.715067	0.668016	0.597111	0.861473	0.366233	0.867382	0.865412	0.873071	0.865412	0.867382	0.0679505	0.168399	0.593391	0.40453	0.482876	0.721633	0.777219	0.79954	0.322026	0.765839	0.721633	0.619214
original_glrlm_GrayLevelNonUniformity	0.518547	0.915527	0.834118	0.869399	0.838805	0.869132	0.975271	0.917059	0.962797	0.897363	0.975271	0.165117	0.0598534	0.810701	0.220484	0.185031	0.24193	0.229018	0.0449721	0.00142248	0.564941	0.62578	0.186782	0.0359996	0.810701	0.214137	0.260751	0.642849	0.404311	0.298829	0.0937739	0.299923	0.0782361	0.0837072	0.0874275	0.0657621	0.0677317	0.666047	0.538024	0.201444	0.242368	0.0692636	0.634533	0.157895	0.181092	0.392713	0.218514	0.634533	0.264252
original_glrlm_GrayLevelNonUniformityNormalized	0.0508808	0.314148	0.333844	0.242272	0.345043	0.283291	0.329467	0.313273	0.365138	0.269942	0.329467	0.168837	0.600832	0.292264	0.982493	0.964766	0.777875	0.994091	0.28351	0.302331	0.334938	0.698873	0.971769	0.248714	0.292264	0.971988	0.981836	0.513076	0.879199	0.948134	0.816829	0.083926	0.782033	0.822519	0.838276	0.767152	0.767589	0.0130211	0.184375	0.123318	0.0802057	0.327498	0.494474	0.918809	0.938505	0.0342488	0.890579	0.494474	0.961046
original_glrlm_GrayLevelVariance	0.0924609	0.369515	0.426852	0.338568	0.47494	0.405624	0.40453	0.438013	0.4669	0.310647	0.40453	0.171244	0.553343	0.370391	0.920998	0.868257	0.715943	0.95076	0.249371	0.291826	0.501696	0.810045	0.877886	0.223985	0.370391	0.885764	0.975271	0.685524	0.960608	0.945946	0.739796	0.165554	0.700624	0.750739	0.778313	0.687712	0.688369	0.200131	0.029872	0.0732028	0.131853	0.250027	0.668235	0.822519	0.853376	0.163585	0.798884	0.668235	0.891017
original_glrlm_HighGrayLevelRunEmphasis	0.243462	0.548966	0.621622	0.560595	0.70661	0.634752	0.652697	0.718131	0.708502	0.522048	0.652697	0.143889	0.296422	0.538024	0.527082	0.428603	0.374986	0.529708	0.0819565	0.137105	0.778969	0.876135	0.432542	0.0445344	0.538024	0.470839	0.596236	0.993872	0.70325	0.544589	0.476091	0.103184	0.457271	0.481563	0.498632	0.447423	0.451143	0.567568	0.380895	0.100996	0.0296531	0.116315	0.992341	0.472809	0.503884	0.220265	0.486815	0.992341	0.478061
original_glrlm_LongRunEmphasis	0.233176	0.250246	0.16249	0.232752	0.0594222	0.194223	0.221578	0.100777	0.112594	0.327935	0.221578	0.152424	0.374767	0.230332	0.705657	0.67677	0.608491	0.640004	0.118941	0.090929	0.0821753	0.420943	0.668892	0.0865521	0.230332	0.70697	0.647007	0.211511	0.434293	0.515921	0.910931	0.553781	0.922749	0.910931	0.906992	0.930408	0.930627	0.406062	0.592953	0.71835	0.549841	0.607835	0.214575	0.830178	0.821644	0.597768	0.799759	0.214575	0.605865
original_glrlm_LongRunHighGrayLevelEmphasis	0.40081	0.643068	0.64832	0.635991	0.757606	0.687055	0.740891	0.794507	0.737608	0.655323	0.740891	0.0211183	0.070139	0.554656	0.129664	0.0799869	0.0134588	0.19291	0.0208994	0.110406	0.616369	0.564504	0.0911478	0.0767042	0.554656	0.0887406	0.255498	0.804793	0.457709	0.300142	0.0333735	0.481563	0.0594157	0.0292155	0.00951964	0.0736404	0.0668563	0.796695	0.729292	0.347631	0.392931	0.20604	0.804793	0.00470511	0.0456286	0.592297	0.0239632	0.804793	0.150673
original_glrlm_RunEntropy	0.508699	0.720976	0.509137	0.489796	0.579777	0.522924	0.702812	0.594704	0.609585	0.743517	0.702812	0.110406	0.293577	0.559252	0.273881	0.271474	0.183937	0.34413	0.252435	0.309334	0.273443	0.380239	0.283948	0.0972754	0.559252	0.255061	0.337564	0.461429	0.510887	0.467338	0.165554	0.851187	0.208447	0.15877	0.124412	0.22683	0.222016	0.571944	0.555969	0.779626	0.840026	0.290732	0.439107	0.0581026	0.0885217	0.864318	0.0594157	0.439107	0.380895
original_glrlm_RunLengthNonUniformity	0.47259	0.880731	0.817923	0.804946	0.848763	0.821425	0.927344	0.883795	0.937849	0.838057	0.927344	0.193566	0.273225	0.765839	0.534085	0.494037	0.50279	0.536492	0.065981	0.106467	0.561878	0.796039	0.495568	0.0333735	0.765839	0.522924	0.561002	0.734544	0.651165	0.57654	0.407594	0.245213	0.393369	0.400153	0.402123	0.380239	0.382208	0.515921	0.335595	0.0773608	0.18722	0.114783	0.720757	0.479812	0.503447	0.313273	0.524674	0.720757	0.556188
original_glrlm_RunLengthNonUniformityNormalized	0.248277	0.171682	0.0432214	0.105159	0.0405997	0.0837072	0.123318	0.0158661	0.0219937	0.226392	0.123318	0.166211	0.396214	0.14367	0.736514	0.704782	0.645475	0.683554	0.139512	0.111938	0.13995	0.493599	0.700624	0.0966189	0.14367	0.734544	0.694715	0.297954	0.499289	0.557939	0.956669	0.55203	0.965642	0.9547	0.946165	0.967611	0.968049	0.348725	0.545902	0.720976	0.550498	0.606959	0.302112	0.855564	0.853594	0.575446	0.838494	0.302112	0.634971
original_glrlm_RunPercentage	0.230113	0.182186	0.0725462	0.136565	0.00798862	0.110406	0.142138	0.0272459	0.0384068	0.244556	0.142138	0.186125	0.386804	0.159645	0.749863	0.717693	0.646132	0.688587	0.120473	0.0876464	0.140606	0.488128	0.711566	0.0904913	0.159645	0.75052	0.696466	0.273662	0.494693	0.566911	0.950323	0.539993	0.961921	0.946821	0.939381	0.967611	0.967392	0.359011	0.557501	0.710253	0.537367	0.613306	0.27607	0.868913	0.860597	0.569318	0.849874	0.27607	0.653791
original_glrlm_RunVariance	0.250465	0.271255	0.172338	0.241506	0.0868899	0.209323	0.241711	0.121129	0.131634	0.348725	0.241711	0.180654	0.337345	0.24762	0.684211	0.661451	0.580698	0.617026	0.0878652	0.0561331	0.0712332	0.387023	0.65226	0.0699201	0.24762	0.688806	0.620527	0.172995	0.405624	0.493818	0.904585	0.579823	0.919904	0.90174	0.894956	0.928876	0.928439	0.431448	0.611774	0.737608	0.572163	0.618996	0.176715	0.818142	0.806981	0.624904	0.788598	0.176715	0.589014
original_glrlm_ShortRunEmphasis	0.239961	0.183062	0.0635737	0.127154	0.0312979	0.0994638	0.143232	0.0314039	0.0362184	0.250027	0.143232	0.149579	0.40453	0.159427	0.732575	0.698216	0.647445	0.681366	0.150016	0.125725	0.13798	0.492067	0.694496	0.105591	0.159427	0.728854	0.69559	0.295109	0.498851	0.551811	0.946821	0.549622	0.9547	0.94901	0.942882	0.95645	0.956888	0.353759	0.547653	0.719444	0.547653	0.593391	0.300361	0.847467	0.848123	0.576102	0.826677	0.300361	0.625342
original_glrlm_ShortRunHighGrayLevelEmphasis	0.182405	0.453332	0.532334	0.467692	0.614686	0.541744	0.55772	0.637816	0.619433	0.428384	0.55772	0.174308	0.332531	0.453332	0.616151	0.519641	0.447204	0.602145	0.0850202	0.126381	0.759711	0.891017	0.520954	0.0554765	0.453332	0.564941	0.66167	0.961484	0.717912	0.583762	0.601926	0.0169603	0.586826	0.605865	0.621622	0.580698	0.583543	0.453332	0.246088	0.229894	0.0795492	0.224204	0.961703	0.589452	0.614181	0.0885217	0.598205	0.961703	0.547215
original_glszm_GrayLevelNonUniformity	0.356385	0.723383	0.719444	0.704492	0.80302	0.72404	0.77875	0.777437	0.85075	0.619871	0.77875	0.187001	0.218952	0.597549	0.491192	0.441514	0.515921	0.475216	0.0169603	0.0335923	0.507605	0.794507	0.443265	0.0373126	0.597549	0.481781	0.512857	0.710034	0.548528	0.462523	0.522705	0.0355619	0.520954	0.526863	0.521611	0.513295	0.517234	0.408032	0.197286	0.210198	0.0957435	0.193785	0.711347	0.51614	0.540431	0.0324981	0.553343	0.711347	0.464493
original_glszm_GrayLevelVariance	0.0961812	0.342379	0.412408	0.355419	0.504596	0.424664	0.413721	0.490535	0.48397	0.317431	0.413721	0.208666	0.472152	0.377612	0.856877	0.771529	0.708064	0.854251	0.166867	0.201226	0.618339	0.896706	0.777437	0.161834	0.377612	0.813765	0.903709	0.764745	0.901083	0.843528	0.753365	0.0370938	0.723383	0.757523	0.786629	0.717693	0.717912	0.304738	0.0948681	0.200131	0.000547106	0.317431	0.752489	0.788379	0.812671	0.0777984	0.792537	0.752489	0.806543
original_glszm_HighGrayLevelZoneEmphasis	0.188533	0.460773	0.534741	0.480057	0.624754	0.550936	0.566036	0.656636	0.627968	0.447642	0.566036	0.183937	0.295328	0.459897	0.57851	0.477842	0.4367	0.556844	0.0581026	0.0904913	0.749207	0.883357	0.477405	0.0235255	0.459897	0.529708	0.621184	0.938724	0.694934	0.558157	0.583105	0.0206806	0.573695	0.581573	0.596236	0.57085	0.572601	0.465368	0.258125	0.230769	0.0883029	0.227924	0.93763	0.560783	0.583543	0.0900536	0.585075	0.93763	0.522048
original_glszm_LargeAreaEmphasis	0.408469	0.695153	0.636722	0.69333	0.508974	0.664952	0.721414	0.593829	0.626655	0.780282	0.721414	0.0300908	0.171244	0.704344	0.267535	0.273443	0.244994	0.232301	0.0907101	0.0307473	0.332531	0.0810811	0.273443	0.0184922	0.704344	0.276507	0.217201	0.238648	0.0160849	0.111719	0.498413	0.51045	0.516358	0.51417	0.510231	0.526206	0.527301	0.623591	0.678958	0.559689	0.478061	0.38177	0.228581	0.397965	0.378707	0.592734	0.3345	0.228581	0.180654
original_glszm_LargeAreaHighGrayLevelEmphasis	0.394244	0.759273	0.798665	0.809651	0.815715	0.845278	0.856658	0.876354	0.855345	0.782252	0.856658	0.0677317	0.0357807	0.734763	0.0869898	0.0519751	0.0125834	0.134041	0.00711238	0.0771419	0.570413	0.492942	0.0565707	0.00229784	0.734763	0.0633549	0.190065	0.678302	0.395995	0.2741	0.120692	0.532115	0.147171	0.127913	0.118941	0.156801	0.153299	0.815297	0.766933	0.409782	0.439545	0.212824	0.668016	0.0333735	0.00908196	0.633001	0.00864427	0.668016	0.144983
original_glszm_SizeZoneNonUniformity	0.222891	0.510887	0.547434	0.498331	0.663384	0.548528	0.573257	0.609804	0.672393	0.390743	0.573257	0.203852	0.279571	0.417661	0.628625	0.575665	0.583324	0.596455	0.0281212	0.0390634	0.501477	0.797133	0.575665	0.0167414	0.417661	0.619871	0.625342	0.687712	0.595361	0.546121	0.657512	0.13798	0.651603	0.665828	0.674363	0.65029	0.654886	0.28548	0.0587592	0.350038	0.186344	0.307364	0.694496	0.662983	0.683554	0.109968	0.663639	0.694496	0.573914
original_glszm_SizeZoneNonUniformityNormalized	0.361199	0.421162	0.176934	0.235816	0.144014	0.181092	0.349163	0.227049	0.211949	0.506511	0.349163	0.16074	0.0486924	0.262064	0.170806	0.127913	0.11916	0.106248	0.168837	0.193347	0.133166	0.119378	0.124631	0.0462852	0.262064	0.164898	0.12091	0.0578838	0.0163038	0.00755006	0.375643	0.55947	0.387898	0.383083	0.397527	0.407156	0.40825	0.167961	0.244119	0.652041	0.568224	0.257687	0.0806434	0.29117	0.292483	0.596674	0.240617	0.0806434	0.0760477
original_glszm_SmallAreaEmphasis	0.344567	0.403655	0.174746	0.230891	0.140622	0.175402	0.333406	0.209542	0.197068	0.489879	0.333406	0.174964	0.0504432	0.25703	0.197505	0.147828	0.12857	0.133822	0.181092	0.204508	0.14936	0.148266	0.145421	0.0651056	0.25703	0.187001	0.150235	0.0812999	0.0182733	0.0362184	0.381552	0.534304	0.38943	0.38943	0.40825	0.407375	0.408688	0.137105	0.218514	0.634971	0.548966	0.251778	0.102965	0.303206	0.306708	0.569975	0.254185	0.102965	0.0996827
original_glszm_SmallAreaHighGrayLevelEmphasis	0.0447533	0.199037	0.300361	0.239427	0.430619	0.31765	0.286136	0.390962	0.399934	0.126163	0.286136	0.257249	0.216326	0.195536	0.597987	0.490754	0.417442	0.557939	0.0430025	0.0248386	0.619214	0.764963	0.49141	0.0686071	0.195536	0.545027	0.606303	0.759492	0.614619	0.522486	0.664734	0.213481	0.668673	0.672393	0.690557	0.672831	0.675895	0.25528	0.0377503	0.457271	0.267097	0.315461	0.769559	0.618339	0.641099	0.164022	0.58792	0.769559	0.516796
original_glszm_ZoneEntropy	0.534085	0.852063	0.642193	0.66094	0.699825	0.672174	0.830397	0.723602	0.777656	0.844841	0.830397	0.0767042	0.329467	0.692089	0.486377	0.439982	0.416348	0.528176	0.187438	0.235584	0.450049	0.649196	0.452238	0.0808622	0.692089	0.45377	0.544151	0.62184	0.685742	0.609804	0.203633	0.559033	0.173214	0.206697	0.216763	0.157457	0.158114	0.48769	0.371485	0.440201	0.532334	0.00470511	0.598862	0.329029	0.361637	0.604114	0.364701	0.598862	0.543057
original_glszm_ZonePercentage	0.269942	0.330999	0.229675	0.284729	0.0906106	0.248933	0.310209	0.178904	0.173433	0.452894	0.310209	0.0736404	0.281541	0.333187	0.531459	0.483751	0.501696	0.479374	0.0904913	0.0535069	0.0563519	0.369296	0.483532	0.0211183	0.333187	0.521611	0.497976	0.205602	0.304081	0.335814	0.794726	0.608491	0.808732	0.812452	0.810045	0.815516	0.817486	0.36295	0.530364	0.740234	0.604552	0.506292	0.220921	0.665609	0.670423	0.642412	0.628625	0.220921	0.40453
original_glszm_ZoneVariance	0.404749	0.701061	0.646132	0.702303	0.522215	0.676551	0.731918	0.602145	0.637816	0.789036	0.731918	0.0449721	0.177153	0.710909	0.258125	0.266878	0.237991	0.225517	0.103841	0.0414706	0.34413	0.0948681	0.266659	0.00711238	0.710909	0.269285	0.209542	0.250684	0.00864427	0.104716	0.485502	0.504103	0.50476	0.50104	0.497538	0.514827	0.515921	0.632783	0.680053	0.548966	0.469964	0.366889	0.240617	0.388336	0.367765	0.585294	0.32706	0.240617	0.172557
original_ngtdm_Complexity	0.0854579	0.358354	0.478499	0.451496	0.555045	0.482219	0.453988	0.54262	0.539775	0.326841	0.453988	0.294234	0.32706	0.377831	0.75052	0.663858	0.678958	0.716599	0.0248386	0.0333735	0.638254	0.934128	0.665609	0.0265893	0.377831	0.712441	0.773498	0.78641	0.760586	0.663202	0.799759	0.208885	0.792975	0.795164	0.807419	0.788379	0.789255	0.311084	0.0598534	0.423132	0.248495	0.408469	0.78444	0.756866	0.776124	0.1266	0.784003	0.78444	0.672174
original_ngtdm_Contrast	0.353321	0.340628	0.247839	0.395907	0.272707	0.337127	0.37805	0.343473	0.336689	0.395558	0.37805	0.00098479	0.445454	0.308239	0.547653	0.610242	0.322464	0.543057	0.290513	0.273443	0.203852	0.0390634	0.606084	0.283291	0.308239	0.577634	0.50279	0.114783	0.286574	0.472809	0.568662	0.2137	0.564941	0.578072	0.547872	0.570413	0.569099	0.683116	0.698435	0.299486	0.195317	0.208447	0.121348	0.625342	0.589889	0.323121	0.548966	0.121348	0.515483
Angle2	0.447218	0.610335	0.459418	0.43154	0.448622	0.471166	0.547302	0.441118	0.543236	0.542558	0.547302	0.0355831	0.36837	0.623439	0.468681	0.370403	0.528777	0.435244	0.203897	0.21926	0.475684	0.633154	0.369726	0.274837	0.623439	0.428918	0.471392	0.478169	0.554758	0.453996	0.294945	0.132279	0.283874	0.301722	0.321604	0.291556	0.288167	0.262637	0.127534	0.029935	0.12392	0.092968	0.470036	0.378537	0.391189	0.174527	0.430499	0.470036	0.454447
Angle3	0.157714	0.362139	0.244759	0.303897	0.212894	0.256824	0.313877	0.266994	0.318876	0.337319	0.313877	0.0979035	0.265615	0.272682	0.301984	0.318186	0.41247	0.304052	0.222868	0.174606	0.0174089	0.234934	0.324219	0.171503	0.272682	0.341283	0.298881	0.0489517	0.260616	0.291297	0.138237	0.217525	0.118932	0.144959	0.138582	0.11152	0.11152	0.120656	0.0494688	0.195979	0.237692	0.225109	0.0401611	0.250447	0.236313	0.162196	0.293366	0.0401611	0.330252
Length2	0.470973	0.600972	0.459145	0.474127	0.402322	0.505549	0.541489	0.425025	0.531139	0.546607	0.541489	0.126586	0.206996	0.651015	0.318001	0.219848	0.353031	0.296619	0.0630088	0.08985	0.509416	0.520448	0.220872	0.218028	0.651015	0.273872	0.328009	0.387606	0.453686	0.346662	0.117601	0.198125	0.103612	0.125563	0.145694	0.115099	0.109299	0.326645	0.23088	0.0955367	0.167644	0.00216095	0.377825	0.212456	0.224056	0.237136	0.245552	0.377825	0.316636
Length3	0.165298	0.358347	0.235106	0.295278	0.208068	0.248551	0.306983	0.261133	0.312671	0.32939	0.306983	0.0941114	0.251481	0.264408	0.28785	0.303708	0.40661	0.288884	0.208734	0.160472	0.023614	0.229763	0.30974	0.157025	0.264408	0.327494	0.286471	0.039644	0.249585	0.277163	0.1341	0.203391	0.115485	0.140133	0.134445	0.108073	0.108073	0.114451	0.0408506	0.185293	0.222524	0.229935	0.0311981	0.238036	0.224247	0.148751	0.283369	0.0311981	0.315428
Area_label2	0.469659	0.551939	0.433626	0.454137	0.395729	0.498507	0.497048	0.420605	0.513212	0.468312	0.497048	0.19498	0.192174	0.606381	0.377613	0.277934	0.396359	0.356622	0.0139191	0.0386144	0.528142	0.554745	0.280965	0.17601	0.606381	0.336192	0.396247	0.379184	0.50412	0.409268	0.197113	0.157376	0.193184	0.204073	0.219114	0.209348	0.203624	0.295445	0.178143	0.0182969	0.117751	0.0725142	0.373684	0.281189	0.289608	0.183082	0.311946	0.373684	0.370541
Area_label3	0.165298	0.358347	0.235106	0.295278	0.208068	0.248551	0.306983	0.261133	0.312671	0.32939	0.306983	0.0941114	0.251481	0.264408	0.28785	0.303708	0.40661	0.288884	0.208734	0.160472	0.023614	0.229763	0.30974	0.157025	0.264408	0.327494	0.286471	0.039644	0.249585	0.277163	0.1341	0.203391	0.115485	0.140133	0.134445	0.108073	0.108073	0.114451	0.0408506	0.185293	0.222524	0.229935	0.0311981	0.238036	0.224247	0.148751	0.283369	0.0311981	0.315428
		0
	0
	1
	2
	3
	4
	5
	6
	7
	8
	9
	10
	11
	12
	13
	14
	15
	16
	17
	18
	19
	20
	21
	22
	23
	24
	25
	26
	27
	28
	29
	30
	31
	32
	33
	34
	35
	36
	37
	38
	39
	40
	41
	42
	43
	44
	45
	46
	47
	48
	49
	50
	51
	52
	53
	54
	55
	56
	57
	58
	59
	60
	61
	62
	63
	64
	65
	66
	67
	68
	69
	70
	71
	72
	73
	74
	75
	76
	77
	78
	79
	80
	81
	82
	83
	84
	85
	86
	87
	88
	89
	90
	91
	92
	93
[truncated: 45 more columns]
